1 **Principles for Systematic Optimization of an Orthogonal Translation**  
2 **System with Enhanced Biological Tolerance**

3

4 Kyle Mohler<sup>1,2</sup>, Jack Moen<sup>1,2</sup>, Svetlana Rogulina<sup>1,2</sup>, and Jesse Rinehart<sup>1,2</sup>

5

6 <sup>1</sup>Department of Cellular & Molecular Physiology, Yale School of Medicine, New Haven, CT  
7 06520, USA

8 <sup>2</sup>Systems Biology Institute, Yale University, New Haven, CT 06516, USA

9

10

11 Correspondence should be addressed to [jesse.rinehart@yale.edu](mailto:jesse.rinehart@yale.edu)

12

13

14 **Keywords:** synthetic biology, orthogonal translation system, phosphoserine, bacterial  
15 physiology, stress tolerance, mistranslation

16

17

## 18 **Abstract**

19           Over the past twenty years, the development of orthogonal biological systems has sparked  
20 a revolution in our ability to study cellular physiology. Orthogonal translation systems (OTSs)  
21 enable site-specific incorporation of hundreds of non-standard amino acids, offering  
22 unprecedented access to the study of cellular mechanisms modulated by post-translational  
23 modifications (e.g. protein phosphorylation). Although development of phosphoserine-OTSs  
24 (pSerOTS) has been significant, little work has focused on the biology of OTS development and  
25 utilization. To better understand the impact of OTSs on host physiology, we utilize pSerOTS as a  
26 model to systematically explore the extent to which OTS components interact with *Escherichia*  
27 *coli*. Using this information, we constructed pSerOTS variants designed to enhance OTS  
28 orthogonality by minimizing interactions with host processes and decreasing stress response  
29 activation. Our expanded understanding of OTS:host interactions enables informed OTS design  
30 practices which minimize the negative impact of OTSs while improving OTS performance across  
31 a range of experimental settings.

32

33

34

35

36

37

38

39

40

41

42

## 43 Introduction

44 Cellular processes have evolved to produce and maintain a finely tuned balance of  
45 macromolecular substrates which drive cellular function. These substrate pools are highly  
46 dynamic; responding quickly to environmental stimuli to mitigate stress and adapt to nutrient  
47 availability<sup>1</sup>. Many adaptation mechanisms are ultimately mediated by transcriptional  
48 reprogramming, but the first sensor of cellular stress is often revolves around a substrate pool,  
49 e.g. nucleotides or amino acids<sup>2</sup>. Due to the extreme metabolic cost of amino acid catabolism, the  
50 amino acid pool is one of the primary sensors used to monitor and report stress associated with  
51 nutrient depletion<sup>3</sup>. The level of an individual amino acid can directly impact the constituency of  
52 the amino acid pool through allosteric regulation and feedback inhibition of metabolic enzymes<sup>1</sup>.  
53 More generally, amino acid levels are monitored indirectly as substrates in the synthesis of  
54 aminoacyl-tRNAs<sup>4</sup>. Aminoacyl-tRNAs (aa-tRNAs) are produced by aminoacyl-tRNA synthetases  
55 (aaRSs) in a two-step reaction in which an amino acid is activated using ATP to form an  
56 aminoacyl-adenylate. The activated amino acid is then transferred to its cognate tRNA to form an  
57 aa-tRNA<sup>5,6</sup>.

58 As direct substrates for translation, aa-tRNAs provide an efficient method to detect any  
59 stress to the cell that negatively impacts protein translation. The bacterial stringent response, for  
60 example, integrates cues from several nutrient sensing mechanisms to mount a complex global  
61 response to nutritional stress by closely monitoring aa-tRNA pool aminoacylation status<sup>2</sup>.  
62 However, this leaves the cell susceptible to conditions which artificially perturb the balance of  
63 translational substrates pools. Disruption of amino acid pool equilibrium, specifically, can perturb  
64 the aa-tRNA pool, resulting in a decrease in translational fidelity by altering kinetic parameters of  
65 tRNA aminoacylation and typically leads to activation of the bacterial stringent response<sup>7</sup>.  
66 Similarly, changes in the activity or fidelity of aaRSs have been demonstrated to alter the ability  
67 of the cell to accurately sense amino acid starvation in *E. coli* and *S. cerevisiae*<sup>8-10</sup>.

68 The field of synthetic biology has fundamentally expanded the repertoire of translational

69 machinery<sup>11</sup>. Advances in gene mining and directed evolution techniques have generated a wide  
70 range of aaRS variants enabling the site-specific incorporation of hundreds of non-standard amino  
71 acids (nsAAs)<sup>12,13</sup>. These orthogonal translation systems (OTSs) have been leveraged to enhance  
72 the functionality of enzymes via systematic incorporation of functionalized amino acid analogues  
73 to increase industrial value<sup>14,15</sup>. OTSs also provide unprecedented access to the study of  
74 biological systems modulated by post-translational modifications (PTMs). Many PTMs are  
75 reversible and often transient in nature making them difficult to study in their native contexts.  
76 Protein phosphorylation is one of the most heavily utilized PTMs in the cell, yet it's dynamic  
77 regulation makes it extremely difficult to study<sup>16,17</sup>. Recent advances in the construction of OTSs  
78 which enable the site specific incorporation of phosphorylated amino acids, e.g. phosphoserine  
79 (pSer)<sup>18</sup>, phosphothreonine (pThr)<sup>19</sup>, and phosphotyrosine (pTyr)<sup>20-22</sup>, have provided  
80 unprecedented access to the study of protein phosphorylation. The most well validated phospho-  
81 OTS is the phosphoserine-OTS (pSerOTS)<sup>23-26</sup>. The pSerOTS uses a phosphoseryl-tRNA  
82 synthetase (pSerRS) derived from *Methanococcus meriplaudis* to aminoacylate pSer onto a  
83 tRNA<sup>Cys</sup> from *Methanococcus janaschii* modified to create a UAG-decoding suppressor tRNA<sup>pSer</sup>  
84 with specificity for pSerRS. To facilitate delivery of pSer-tRNA<sup>pSer</sup> to the ribosome, *E. coli*  
85 elongation factor Tu (EF-Tu) was evolved to bind the larger, negatively charged moiety creating  
86 EF-pSer (**Figure 1A**)<sup>18</sup>. Since its initial deployment, several additional pSerOTS variants have  
87 been released with functional improvements aimed at enhancing purity and yield of modified  
88 recombinant protein production. Although the study of the pSerOTS itself has been significant,  
89 relatively little work focused on the host aspect of OTS deployment. A major advancement in the  
90 deployment of OTSs, in general, was the development of a recoded strain of *E. coli* (C321.ΔA)<sup>27</sup>.  
91 This strain was modified using multiplexed automatable genome engineering (MAGE) to  
92 completely replace every genomic occurrence of the amber (UAG) stop codon with the UAA stop  
93 codon, freeing the UAG codon for use by the OTS<sup>28</sup>. Together with the deletion of release factor  
94 1 (RF1), this strain dramatically reduces the cellular stress caused by off-target suppression of

95 amber stop codons associated with non-recoded cells and decreases protein truncation caused  
96 by premature translation termination in recombinant proteins possessing internal UAG codons<sup>29-</sup>  
97 <sup>31</sup>.

98         Outside of strain recoding efforts, the biology of OTS development and specifically the  
99 impact on the host organism has been largely overlooked. As implied by the name, OTSs are  
100 meant to be orthogonal to host processes and essentially invisible to the cell outside of their use  
101 in recombinant protein expression. The introduction of an OTS into the cell adds a foreign element  
102 to the make-up of cellular substrate pools. Realistically, the components of the OTS interact with  
103 these pools with varying extent. The introduction of nsAAs to the amino acid pool presents host  
104 aaRSs with the opportunity to interact with an additional substrate which may lead to  
105 misaminoacylation or aaRS inhibition. Likewise, the introduction of a new aaRS:tRNA pair to the  
106 cell may challenge the fidelity and efficiency of the host translation machinery which evolved in  
107 the absence of this additional substrate<sup>32-35</sup>. Each foreign element introduced into the cell is an  
108 opportunity to perturb the balance or fidelity of substrate pools and activate stress responses, like  
109 the stringent response. To better understand the impact of OTSs on host physiology, we have  
110 explored the extent to which each of our model OTS (pSerOTS) components cause stress within  
111 the cell through in-depth profiling of interactions with cellular substrate pools and identification of  
112 the potential outcomes of those interactions. Using this information, we construct several  
113 pSerOTS variants designed to enhance OTS orthogonality by minimizing the interactions with  
114 host substrate pools and decreasing global OTS burden. Overall, we present a framework for the  
115 systematic characterization of OTS components and their participation in host cellular processes.  
116 This framework can be generally applied to OTS development and should serve as a guide for  
117 future OTS design and re-evaluation of existing OTSs with a central focus on enhancing biological  
118 tolerance.

119

120

## 121 **Results**

### 122 *OTS components impact the growth and viability of host cells*

123 To gain a cursory understanding of the impact OTSs have on the growth and viability of  
124 host cells, we constructed pSerOTS derivatives with varying levels of component expression.  
125 Derivatives included modulation of expression from the pSerRS:EF-pSer operon, alteration of  
126 plasmid origin of replication, and increases in tRNA copy number (**Figure 1B**). We then  
127 systematically introduced these OTS variants into divergent lineages of *E. coli*. The first is a fully  
128 recoded K-strain MG1655 derivative, rEcoli – experimental phosphoserine (rEcoli<sup>xpS</sup>), and the  
129 second is a non-recoded B-strain, BL21 (DE3) routinely used in recombinant protein expression.  
130 Each strain carries a deletion for the phosphoserine phosphatase, serB, in the serine biosynthesis  
131 pathway to eliminate the conversion pSer to Ser, ensuring an adequate supply of pSer in the  
132 amino acid pool<sup>36</sup>. Using these systems, we performed kinetic growth analyses to construct an  
133 overview of the potential impact of OTS components on growth and viability (**Figure 1C, Table**  
134 **S2**). Although highly functional, our best pSerOTS variant to date (pSerOTS $\lambda$ ) has been observed  
135 to cause growth deficiency and strain instability in some contexts. This presents pSerOTS $\lambda$  as an  
136 ideal model for the present study and therefore used to establish baseline growth parameters for  
137 OTS variant benchmarking. In rEcoli<sup>xpS</sup>, inclusion of pSerOTS $\lambda$  caused a ~2-fold decrease in  
138 growth rate when compared to cells lacking the OTS. In addition to a reduction in growth rate, cell  
139 size, an indicator of stress in *E. coli*, was increased ~50% in rEcoli<sup>xpS</sup> cells with pSerOTS $\lambda$  when  
140 compared to rEcoli<sup>xpS</sup> cells alone (**Figure S1**). Attempts to introduce pSerOTS $\lambda$  into non-recoded  
141 BL21 (DE3) cells were unsuccessful, likely due to the stress imparted by aberrant nonsense  
142 suppression events at ORFs terminating in UAG (**Figure 1C**). We next examined OTS variants  
143 that were rationally designed using regulatory components successfully deployed in other OTS  
144 contexts. The most heavily modified pSerOTS variant placed control of the pSerRS:EF-pSer  
145 operon under the constitutive, low level promoter glnS\*. A single copy of tRNA<sup>pSer</sup> was placed  
146 under the control of a proK *E. coli* tRNA promoter<sup>37</sup>. This ColE1-based vector was designated

147 pSerOTSc and used as the basis for comparison for OTSs derived from this base lineage (**Figure**  
148 **1B**). The growth rate of rEcoli<sup>XpS</sup> cells containing pSerOTSc was nearly identical to that observed  
149 in WT cells. This is in stark contrast to the decrease in growth rate observed in cells with  
150 pSerOTS $\lambda$ . pSerOTSc was successfully introduced into non-recoded BL21 (DE3)  $\Delta$ serB cells, but  
151 displayed compromised growth compared to WT BL21 (DE3)  $\Delta$ serB. Analysis of pSerOTSc  
152 variant performance in BL21 (DE3) by Phos-tag<sup>TM</sup> gel and immunoblot revealed that most BL21  
153 (DE3) strains with OTS variants failed to adequately facilitate pSer incorporation into the  
154 E(17)TAG-GFP reporter protein. Successful OTS deployment in BL21 (DE3) depended on the  
155 use of a partially genomically recoded strain of BL21 (BL21 (DE3) B-95)<sup>38</sup>, with pSerOTSc  
156 exhibiting the best performance overall (**Figure S2**).

157 tRNA copy number is an important factor in the deployment of a productive OTS<sup>24</sup>. Using  
158 pSerOTSc as a base, we created OTS variants with increasing tRNA copy number (**Figure 1B**).  
159 We introduced these OTS variants into both rEcoli<sup>XpS</sup> and BL21 (DE3)  $\Delta$ serB. In rEcoli<sup>XpS</sup>, we  
160 observed a dose dependent decrease in growth rate as tRNA copy number was increased. The  
161 same trend held for BL21 (DE3)  $\Delta$ serB, however cells became inviable with OTS variants having  
162 greater than two copies of tRNA. Similar results were obtained using OTS variants with identical  
163 OTS components but altered to include the Rop protein to mediate a decrease in tRNA copy  
164 number. The only exception to OTS viability extending beyond the inclusion of 2x tRNA in BL21  
165 (DE3)  $\Delta$ serB was when the origin of replication on the OTS plasmid was switched to lower copy  
166 p15a. Both rEcoli<sup>XpS</sup> and BL21 (DE3) cells harboring OTS variants with p15a origins were viable  
167 and generally tolerated increases in tRNA copy number (**Figure 1C-D**).

168 To narrow down the potential contribution of each OTS component to the observed growth  
169 differences, we constructed variants expressing only individual OTS components. The first  
170 component we isolated for expression in the host cell was the aaRS. As a starting point, we  
171 modified the existing pSerOTS $\lambda$  OTS to excise the tRNA and EF-pSer components, leaving  
172 pSerRS under the control of the modified TRC promoter (TRC\*) which provided constitutive, high

173 level of pSerRS. For comparison, we constructed an additional vector expressing pSerRS under  
174 control of glnS\*. The growth of component OTS vectors was only measured in rEcoli<sup>XpS</sup> to reduce  
175 confounding growth defects due to codon suppression . In comparison to *E. coli* lacking an OTS  
176 (WT), cells expressing glnS\*-pSerRS showed a slight growth defect, while cells expressing TRC\*-  
177 pSerRS displayed a significant decrease in growth (**Figure 1E**). We constructed tRNA only  
178 plasmids by removing the pSerRS:EF-pSer operon from vectors illustrated in Figure 1B. For the  
179 pSerOTSc derived tRNA variant plasmid, a similar tRNA copy number dependent decrease in  
180 growth rate to that of the counterparts with pSerRS:EF-pSer was observed. In contrast, the  
181 pSerOTS $\lambda$  derived tRNA only plasmid (4x tRNA driven by five independent lpp promoters)  
182 displayed improved growth performance when compared to the pSerRS only and full pSerOTS $\lambda$   
183 variants. Altogether, analysis of the impact of full and individual OTS components on growth  
184 suggests that both pSerRS level and tRNA copy number are important factors influencing cellular  
185 viability.

186 While host tolerance is essential to the successful deployment of an OTS, function and  
187 fidelity are equally as important. To assess the performance of the newly constructed pSerOTSc  
188 lineage against that established by the progenitor pSerOTS $\lambda$ , we expressed E(17)TAG-GFP  
189 reporter alongside each OTS variant. GFP containing pSer was separated from non-pSer  
190 containing GFP using a Phos-tag<sup>TM</sup> SDS-PAGE gel-shift assay visualized by immunoblot against  
191 a C-terminal 6xHis epitope tag. GFP reporter expression facilitated by pSerOTS $\lambda$  was decreased  
192 when compared to pSerOTSc variants. Interestingly, the tRNA copy number dependent decrease  
193 in cellular viability was inversely proportional to the amount of non-pSer containing GFP reporter  
194 (**Figure 1D**). This observation suggests that tRNA<sup>pSer</sup> misaminoacylation may play a role observed  
195 decrease in viability. Taken together, the preliminary growth analysis and corresponding reporter  
196 expression data indicate that each component of the OTS, and it's relative level of expression, is  
197 critically important to both host tolerance and OTS fidelity.

198



199 Figure 1:

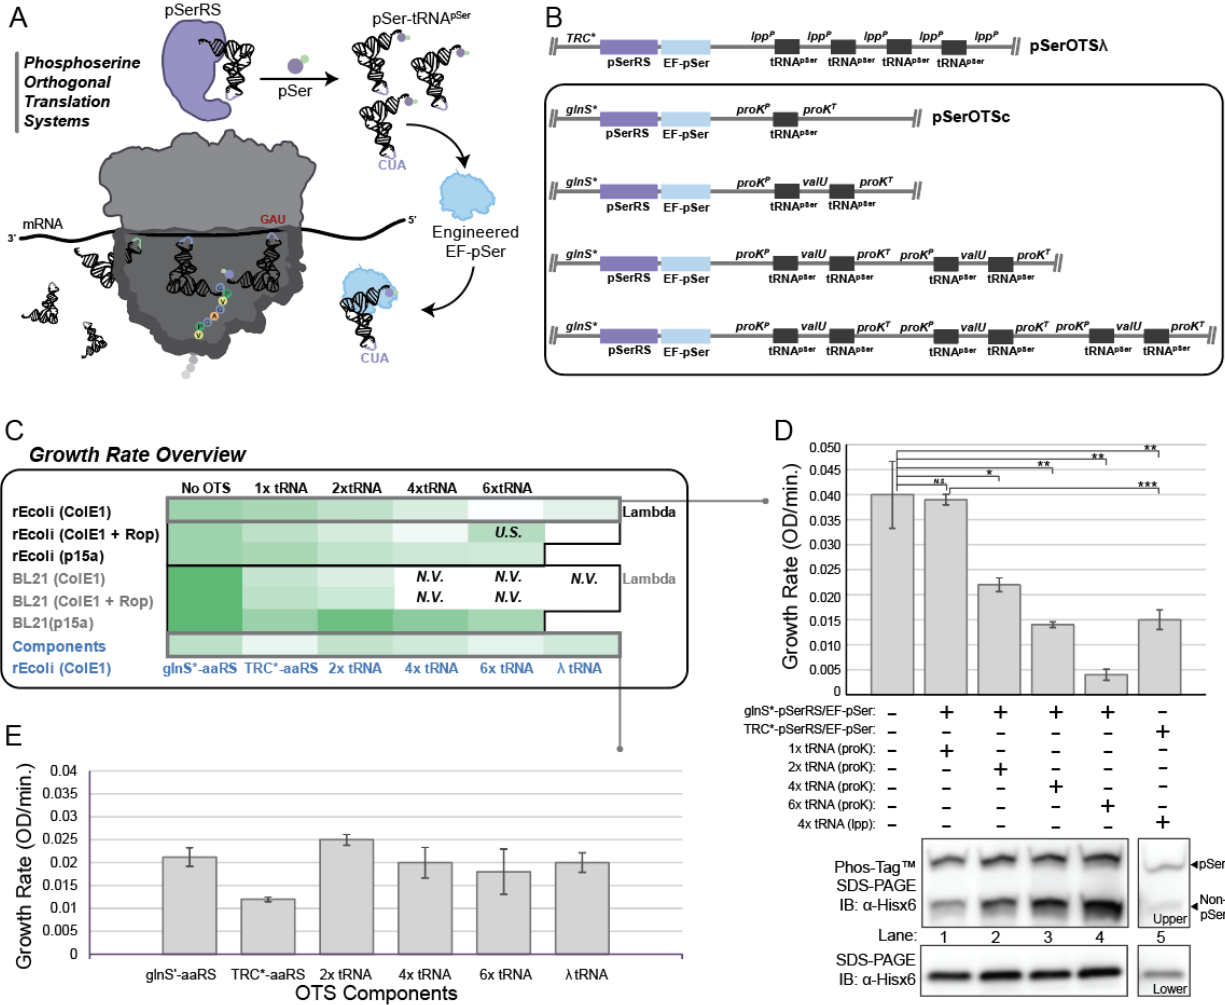

200

**Figure 1: pSerOTS components impact cellular growth and viability.** Components of the pSerOTS are illustrated in (A). Variations to OTS architecture include the implementation of *glnS\** (modified *Ec* GlnRS promoter) and the *proK* (*Ec* tRNA<sup>Pro</sup>) promoter/terminator with *valU* tRNA linker sequence (*Ec* tRNA<sup>Val</sup> operon) (B) These components are predicted to influence the overall viability of cells harboring OTSs. The effect on the growth of *E. coli* cells expressing various OTSs or components was assessed by determination of kinetic growth parameters through measurement of cell density over time, providing a measure of growth rate. N.V. = Not Viable, U.S. = Unstable, plasmid easily mutates to reduce tRNA copy (C). The impact of tRNA copy number variation on growth and translational fidelity was assessed by comparison of growth rates to relative pSer incorporation into a GFP reporter as determined by Phos-Tag™ SDS-PAGE and immunoblot (D). The influence of individual OTS components on growth rate is highlighted in (E). All growth parameters reflect the average measurements from three independent replicates with error bars representing 1 S.D. Statistical significance of growth rate changes was assessed using an unpaired t-test where \* equals p < 0.05, \*\* equals p < 0.005, \*\*\* equals p < 0.0005 and N.S. denotes Not Significant.

201

202

203 *High-level orthogonal aaRS expression redirects cellular resources and decreases aa-tRNA pool*  
204 *fidelity*

205           When an OTS is introduced into a cell, the cell must redirect transcriptional and  
206 translational resources towards the production of OTS components. Typically an OTS is used in  
207 conjunction with additional vectors expressing recombinant protein targeted by the OTS. Thus,  
208 the commitment of resources to OTS expression needs to be carefully weighed against the  
209 expression of the target recombinant protein. Even then, the possibility remains that the impact  
210 of the OTS on cellular physiology may prevent efficient expression of either system, as evident  
211 by the growth defects and variable reporter expression levels observed in Figure 1. To better  
212 understand the implications of OTS expression on the host cell, we performed in-depth proteomic  
213 analysis of rEcoli<sup>XpS</sup> in different pSerOTS contexts with particular emphasis on the expression of  
214 pSerRS and its impact on host physiology. To measure pSerRS levels, rEcoli<sup>XpS</sup> cells were  
215 transformed with pSerOTS $\lambda$ , pSerOTS<sub>c</sub>, or Rop/p15a versions of pSerOTS<sub>c</sub> and grown to mid-  
216 log in nutritionally replete medium. Total protein was extracted from each condition, subjected to  
217 proteolytic digest, and quantified using a shotgun proteomics approach. Analysis of the proteomic  
218 data yielded rank-ordered lists based on relative abundance of individual *E. coli* and OTS proteins.  
219 pSerRS and native *E. coli* aaRSs were plotted for each experimental condition to illustrate the  
220 abundance of pSerRS compared to the rest of the aaRS pool within the context of the *E. coli*  
221 proteome (**Figure 2A**). Surprisingly, the level of pSerRS from pSerOTS $\lambda$  (top 10 most abundant)  
222 indicated it was one of the most abundant proteins in the cell; substantially higher than any native  
223 aaRS level which typically rank 300-400. Beyond the extreme metabolic demand of maintaining  
224 high-level expression during log-phase growth, the abundance of pSerRS is likely to challenge  
225 the cell by disrupting the binding equilibrium within amino acid and tRNA substrate pools. This  
226 has previously been demonstrated to decrease enzymatic selectivity resulting in mistranslation  
227 events in both *E. coli* and *S. cerevisiae*<sup>39,40</sup>. Expression of pSerRS from pSerOTS<sub>c</sub> fell within the  
228 range of expression of native aaRSs. Overall, pSerRS expression from the pSerOTS<sub>c</sub> copy

229 number variants decreased with plasmid copy number, as expected (**Figure 2A-B**).

230 Comprehensive proteomic analysis also provides a snapshot of active cellular processes  
231 which allow us to deduce protein networks and infer deleterious responses to OTS challenge. To  
232 further understand the effects of each OTS component on the host cell, we expanded our  
233 proteomic analysis to include rEcoli<sup>XpS</sup> expressing only the tRNA (Lambda tRNA) or pSerRS  
234 (Lambda aaRS) components of pSerOTS $\lambda$  (Lambda). Together with the full OTS proteomic data,  
235 we can attribute proteomic responses to each OTS constituent. We compiled the rank ordered  
236 protein abundance lists from each condition obtained in triplicate and performed statistical  
237 analysis to determine the proteins whose expression deviates significantly from the control  
238 rEcoli<sup>XpS</sup> proteome devoid of OTS influence. The lists of proteins with significantly up-regulated  
239 and down-regulated protein expression compared to the rEcoli<sup>XpS</sup> control were cross referenced  
240 to identify overlap between each experimental condition (**Figure 2C**). Pairwise comparison of  
241 significant proteins across the sample conditions highlights the substantial difference in the total  
242 number of significantly divergent proteins between pSerOTSc and pSerOTS $\lambda$ -derived OTSs.  
243 pSerOTSc had 57 up-regulated proteins and 67 down-regulated proteins compared to the  
244 rEcoli<sup>XpS</sup> control, while Lambda had 179 up-regulated and 208 down-regulated proteins. Similar  
245 levels were observed in the Lambda aaRS only proteome (**Figure 2D**). The observed increase in  
246 dis-regulated proteins relative to the pSerOTSc proteome underscores the extent to which  
247 Lambda perturbs the proteome of the host cell. These data also capture the extent that a host  
248 proteome differs with an OTS, in general, which further highlights the host cell burden.

249 To further understand OTS-mediated changes to the proteome, we constructed volcano  
250 plots comprised of every up- and down-regulated protein expressed in Lambda and pSerOTSc  
251 relative to the rEcoli<sup>XpS</sup> control. Points which lie on the right side of each plot represent up-  
252 regulated proteins, while those above the curved boundary line are significant. We hypothesized  
253 that constant demand from pSerRS expression on pSerOTS $\lambda$  might require an increase in  
254 translational capacity within the cell and examined levels of ribosomal protein subunits

255 (highlighted in red) as a proxy for translational demand. As illustrated, Lambda containing cells  
256 display a significant increase in the levels of ribosomal proteins compared to cells containing  
257 pSerOTSc (**Figure 2E**). In congruence with the highlighted difference in ribosomal protein  
258 expression, the complete overview of significant proteomic changes overlaid on the *E. coli*  
259 genome illustrates generalized effect of high-level pSerRS expression on the proteome (**Figures**  
260 **S3-S4**). These data clearly illustrate the intense translational demand imparted by pSerRS  
261 expression from pSerOTS $\lambda$  which results in substantial redirection of cellular resources towards  
262 the production of ribosomes. This observation may also help to explain the perceived reduction  
263 in recombinant reporter expression from these cells when compared to cells utilizing a more  
264 conservative pSerOTSc variant. Unique overlap of up-regulated proteins between Lambda and  
265 the Lambda aaRS variant confirms that the upregulation of ribosomal proteins is the result of high-  
266 level pSerRS expression. Further analysis of these sample groups revealed up-regulation of RNA  
267 polymerase subunits, likely required to support high level transcription of pSerRS (**Figure 2F**).  
268 Additional pathway analysis of the proteomic results from the four sample groups (Lambda,  
269 pSerOTSc, Lambda tRNA, and Lambda aaRS) revealed OTS-composition dependent changes  
270 in metabolic processes within the host cell. In addition to the translational demands of Lambda,  
271 the cell also up-regulates the expression of proteins involved in nucleotide biosynthesis, while  
272 simultaneously down-regulating proteins involved in nucleotide degradation (**Figure 2G**). This  
273 metabolic reprogramming may be required to support the combined transcriptional demand of the  
274 pSerRS:EF-pSer operon and tRNA cassette on pSerOTS $\lambda$  (**Figure 2G**). Lambda also elicits a  
275 unique cellular response through up-regulation of proteins involved in fatty acid biosynthesis and  
276 concomitant decrease in fatty acid degradation proteins. The cause of this metabolic  
277 reprogramming event is less readily apparent and may be related to carbon-mediated short chain  
278 fatty acid stringent response activation or perturbation of regulatory proteins<sup>41,42</sup> (**Figure 2G**,  
279 **Figure S5**). Unique metabolic reprogramming in the tRNA only OTS sample centered around up-  
280 regulation of amino acid biosynthesis, a hallmark of stringent response activation due to an

281 increase in deacylated tRNA pools<sup>43</sup> (**Figure S6**). While pSerOTS $\lambda$ , and OTSs derived from  
282 pSerOTS $\lambda$ , severely perturbed proteomic homeostasis, relatively few alterations to the proteome  
283 were observed during expression of the pSerOTS $\lambda$  system that correspond well with OTS-  
284 mediated growth characteristics. Overall, these data reinforce the notion that fine-tuning OTS  
285 component expression based on in-depth proteomic analysis can minimize the impact of an OTS  
286 on the host cell.

287

288

289

290

291

292

293

294

295

296

297

298

299

300

301 Figure 2:

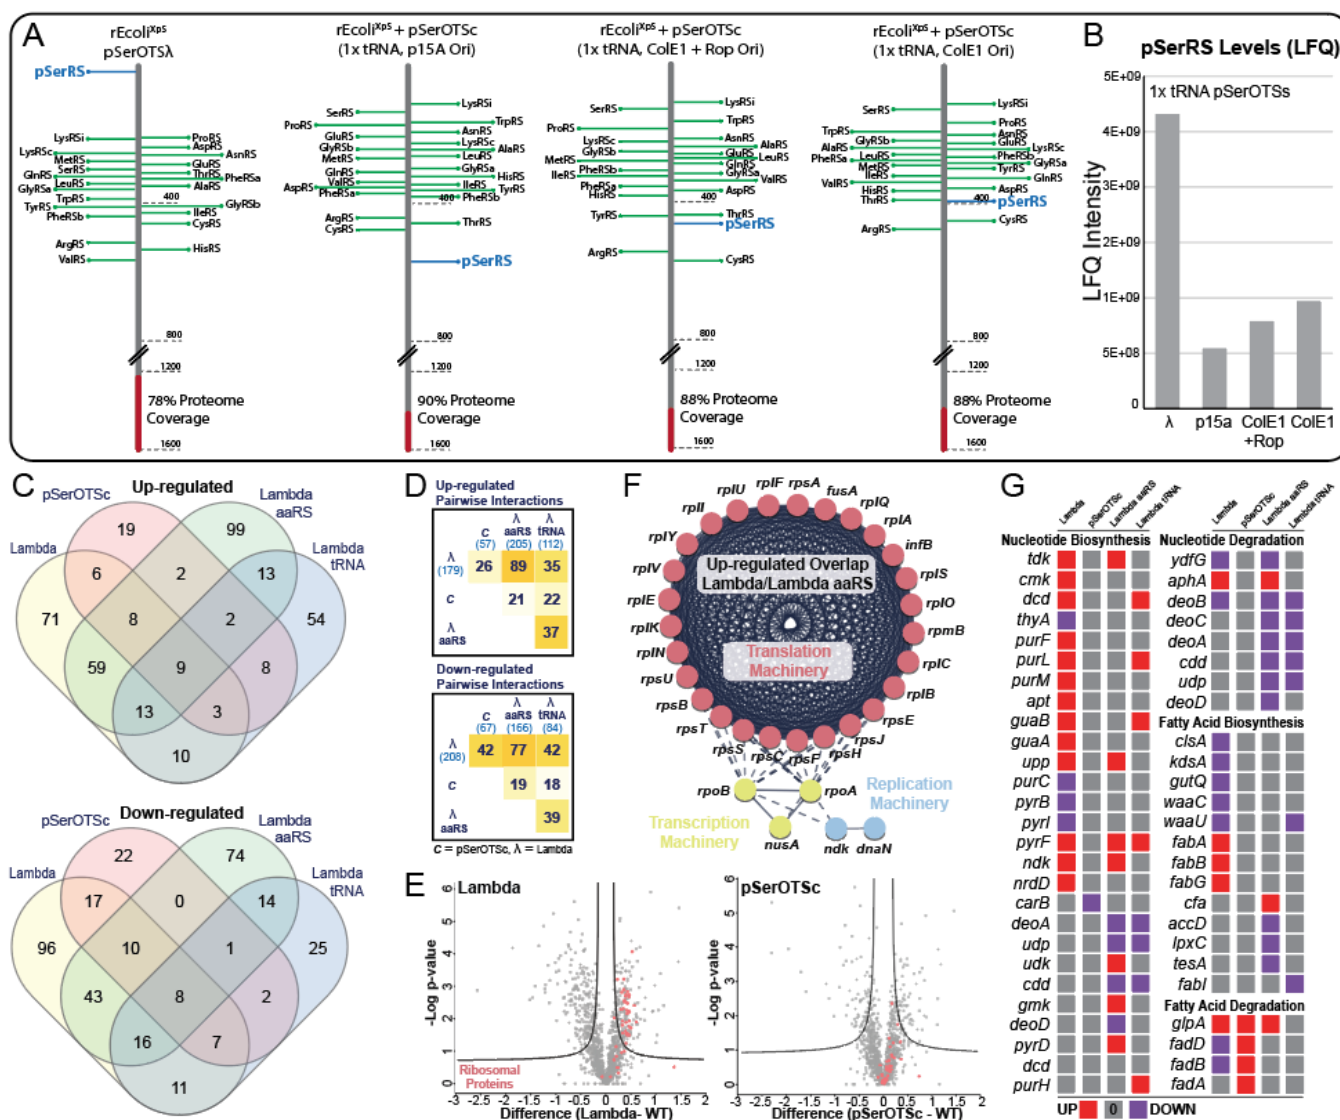

**Figure 2: pSerRS expression levels modulate cellular fitness and stress response.** The level of pSerRS protein in cells containing various OTS constructs was measured by mass spectrometry and the position of pSerRS (blue line) relative to all proteins detected in the proteome is displayed in the context of native aaRS levels (green lines) (A). Total pSerRS levels were determined by label-free quantification and graphed as a function of OTS variant (B). rEcoli<sup>XPS</sup> cells expressing complete or partial OTS constructs were subjected to proteomic analysis. The overlap of significantly upregulated and downregulated proteins is summarized in (C). Pairwise overlap across experimental conditions is highlighted in (D). Alteration of the proteomes from cells containing pSerOTS $\lambda$  and pSerOTSc are illustrated as volcano plots by plotting functions of the p-value against differences in proteome composition compared to WT cells without an OTS. Significant proteins are indicated as those outside the asymptote (black lines) with the expression of ribosomal proteins highlighted in pink (E). The overlap in upregulated proteins from proteomes impacted by pSerOTS $\lambda$  and Lambda aaRS alone was input into stringDB to identify statistically significant pathway enrichment and grouped using k-means clustering algorithm. Known protein-protein interactions were enriched for upregulation in translational (pink), transcriptional (yellow), and replication (blue) machinery (F). Pathway enrichment analysis was conducted for strains harboring OTS variants using Pathway Tools and to illustrate the regulation of the highly impacted pathway components with up-regulated proteins in red, down-regulated proteins in purple, and proteins with no change compared to WT in grey. Enrichment cutoffs were set to a statistically significant differential expression score of 0.1 (G). All proteomes were quantified in triplicate and analyzed in Perseus using t-test and volcano plot functions to obtain statistically significant proteomic deviations.

302 From amino acids to tRNAs, aaRSs interact with a wide range of cellular substrate pools.  
303 Extensive literature on aaRS enzymology both *in vitro* and *in vivo* has illustrated the potential for  
304 high level expression of aaRSs to disrupt the kinetic environment leading to competition between  
305 aaRSs for substrate binding often resulting in misacylation events<sup>39,40</sup>. Even so,  
306 misaminoacylation of the native tRNA pool due to the introduction of an orthogonal aaRS has  
307 never been systematically profiled. While interactions between pSerRS and native tRNAs have  
308 been explored in a limited context *in vitro*, numerous proofreading mechanisms exist in the cell  
309 post-aminoacylation which may prevent misincorporation of pSer into the proteome<sup>44-47</sup>. To  
310 investigate whether high-level expression of pSerRS facilitates pSer misincorporation *in vivo*, we  
311 leveraged our recently developed Mass Spectrometry Reporters for Exact Amino Acid Decoding  
312 (MS-READ) reporters. The flexible design of this reporter protein enabled us to investigate  
313 misincorporation events for various native codons at the guest position of the reporter peptide<sup>48</sup>.  
314 Codons for the amino acids Gly, Ser, and Thr, were initially chosen for their similarities in tRNA  
315 recognition elements (outlined below). MS-READ analysis revealed that the majority of the  
316 incorporation events were faithful to the amino acid coded at the guest position. Only the Gly  
317 reporter had a measurable level of pSer misincorporation (**Figure 3A, Figure S7**). Careful  
318 examination of the tRNA recognition elements used by aaRSs for tRNA selection shared between  
319 tRNA<sup>Gly</sup> and tRNA<sup>pSer</sup> identified significant overlap in major tRNA<sup>pSer</sup> recognition elements in the  
320 primary sequence of tRNA<sup>Gly</sup> (**Figure 3B**). This suggests a mechanism for misaminoacylation of  
321 pSer onto tRNA<sup>Gly</sup> due to tRNA misrecognition and provides *in vivo* evidence of *in vitro*  
322 observations<sup>18,49</sup>. We next re-examined our proteomic data for pSer misincorporation events at  
323 native Gly positions in host proteins. Without phospho-enrichment strategies, we found a total of  
324 33 unique peptides with pSer misincorporation at native Gly codons (**Table S3**). An example of  
325 one such event at Gly110 of groL is shown in **Figure 3C**. The misincorporation of pSer at Gly  
326 codons is an important example of native proteome damage caused by an orthogonal aaRS and  
327 highlights importance of monitoring and tuning aaRS expression during OTS development.

328 Figure 3:

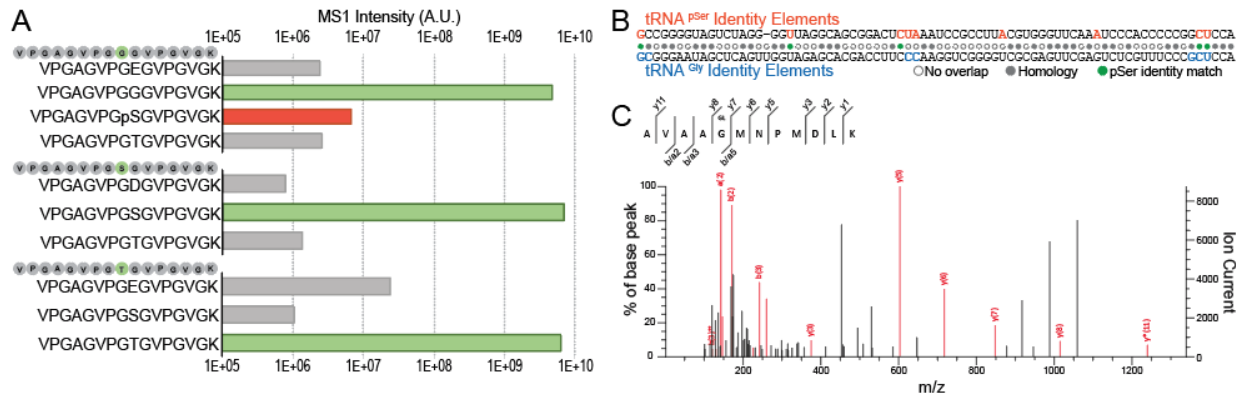

**Figure 3: High level pSerRS expression results in proteome-wide pSer misincorporation.** Decoding fidelity at Gly, Ser, and Thr codons was assessed by monitoring site-specific amino acid incorporation. Amino acids incorporated at the indicated reporter position (green circle) were quantified by mass spectrometry and incorporation events were graphed to display faithful decoding (green bars), misincorporation (grey bars), and pSer misincorporation (red bars) as a function of MS1 precursor ion intensity (**A**). tRNA identity elements for *E. coli* tRNA<sup>Gly</sup> (blue) and tRNA<sup>pSer</sup> (orange) were highlighted on the tRNA primary sequence and aligned to identify primary sequence overlap (grey circles) and pSerRS recognition elements common to both tRNAs (green circles) (**B**). The proteomes from pSerOTS $\lambda$  and Lambda aaRS only cells were searched for pSer misincorporation using custom modification parameters in Mascot. The MS2 spectrum and sequence for example groL peptide (m/z 664.293 M<sup>++</sup>) found in all samples is presented in (**C**).

329

330

331

332

333

334

335

336

337

338

339

340

341

342



343 *Balance of orthogonal tRNA in the tRNA pool is essential to translational fidelity*

344           Specific OTS components may affect recombinant protein quality in addition to yield. We  
345 noticed that increasing the copy number of the suppressor tRNA while decreasing the levels of  
346 pSerRS led to an increase in non-phospho recombinant protein (**Figure 1D**). Two major sources  
347 of tRNA-mediated reductions in OTS fidelity are near-cognate suppression by host tRNAs and  
348 misaminoacylation of tRNA<sup>pSer</sup> by native aaRSs<sup>50-52</sup>. This occurs by an orthogonal tRNA disrupting  
349 the composition of the native tRNA pool and interfering with native aminoacylation kinetics. To  
350 better understand the implications of orthogonal tRNA introduction to the host cell, we thoroughly  
351 characterized the interactions between tRNA<sup>pSer</sup> and host physiology with particular emphasis on  
352 translational fidelity.

353           The suppression of stop codons occurs naturally in protein translation by ribosomal read-  
354 through using near-cognate aa-tRNAs and, more spontaneously, by mutations to the anticodon  
355 region of a tRNA resulting in a suppressor tRNA<sup>53,54</sup>. In their native context, many of these read-  
356 through events arise at random, but some serve regulatory roles or facilitate priming the cell for  
357 enhanced stress tolerance through decreased translational fidelity resulting in erroneous protein  
358 synthesis and misfolding<sup>55-58</sup>. In rEcoli<sup>XpS</sup>, a strain fully recoded to remove all UAG stop codons,  
359 the cells access to the UAG codon has been limited to instances in recombinantly expressed  
360 proteins. To assess the interaction between the recoded cells native aa-tRNA pool and artificially  
361 restricted codon, we measured the rates of amino acid misincorporation by near-cognate  
362 suppression using MS-READ. rEcoli<sup>XpS</sup> cells were transformed with an MS-READ reporter  
363 plasmid with a UAG codon in the guest position of the reporter peptide. Amino acid incorporation  
364 events were observed in the absence of an OTS. Analysis of the purified reporter revealed that  
365 the majority of the misincorporation events were Phe and Gln, with moderate levels of Tyr and  
366 low levels of Lys and Asn also observed (**Figure 4A**). The incorporation of Gln, Tyr, and Lys has  
367 been previously observed as UAG near-cognate suppression events, however the relatively high  
368 level of Phe incorporation is unexpected and may be an artifact unique to rEcoli<sup>XpS</sup> cells<sup>59</sup>. As a

369 whole, these data establish the fundamental baseline for native near-cognate and non-cognate  
370 suppression events in rEcoli<sup>XpS</sup> cells at UAG codons in the absence of OTS components.

371         Orthogonal tRNAs challenge cells with foreign, yet highly similar substrates for molecular  
372 interactions. The limited chemical variability afforded tRNAs by their four base composition  
373 creates issues with tRNA recognition element overlap across isoacceptor groups<sup>60,61</sup>. To identify  
374 the elements of orthogonal tRNA<sup>pSer</sup> which enable a steady state pool of misaminoacylated tRNA  
375 and results in misincorporation, we again used the MS-READ reporter expressed in rEcoli<sup>XpS</sup> cells  
376 alongside a vector containing two copies of tRNA<sup>pSer</sup>. Analysis of the purified reporter protein  
377 revealed high-level misincorporation of Gly and Thr compared to background misincorporation  
378 events (**Figure 4B**). These misincorporation events are 100-fold greater than near-cognate  
379 suppression events identified in the reporter only sample (**Figure 4A**), suggesting that these  
380 events are more likely the result of misaminoacylation of tRNA<sup>pSer</sup> with Gly and Thr rather than  
381 nonsense suppression mediated by native tRNA. The identity elements that govern the  
382 interactions of both glycyl-tRNA synthetase (GlyRS) and threonyl-tRNA synthetase (ThrRS) have  
383 been extensively characterized in prior work<sup>49,62,63</sup>. Using these data, we mapped the overlap of  
384 tRNA recognition elements onto the primary sequence of tRNA<sup>pSer</sup> (**Figure 4C**). For both tRNA<sup>Gly</sup>  
385 and tRNA<sup>Thr</sup>, major recognition elements are found in the acceptor stem of tRNA<sup>pSer</sup> at G1:C72  
386 and C2:G71 and are compatible with the discriminator base U73 used for tRNA<sup>pSer</sup> recognition<sup>18</sup>.  
387 The inclusion of these identity elements in the primary sequence of the orthogonal tRNA<sup>pSer</sup>  
388 demonstrates how the introduction of orthogonal tRNAs into the tRNA pool can lead to aberrant  
389 interactions and, in this case, results in misrecognition and misaminoacylation of tRNA<sup>pSer</sup> by Gly-  
390 and ThrRS. Orthogonal tRNA misaminoacylation profiling, in general, should be considered an  
391 essential component of OTS development as it provides key insights in tRNA orthogonality and  
392 informs changes that could lead to enhanced biological tolerance.

393         After profiling the interactions of orthogonal aaRS and tRNA components with the host  
394 cell, we focused our analysis on host interactions with a complete OTS. Variants of pSerOTSc

395 with 1x, 2x, 4x, or 6x tRNA<sup>pSer</sup> were co-transformed into rEcoli<sup>XpS</sup> cells with the MS-READ reporter  
396 to monitor decoding of the UAG codon. The results revealed that the tRNA-dependent increase  
397 in non-pSer containing reporter protein observed in Figure 1D is likely the result of increasing  
398 tRNA misaminoacylation. At low tRNA copy number (e.g. 1x tRNA), misaminoacylation is  
399 relatively low, but as the pool of orthogonal tRNA is expanded in cells, a dose-dependent increase  
400 in misaminoacylation by native aminoacyl-tRNA synthetases leads to a marked increase in the  
401 relative incorporation rates of Gly and Thr relative to pSer (**Figure 4C**). Interestingly, high level  
402 Ser misincorporation was also observed alongside Gly and Thr misincorporation. Ser  
403 misincorporation required both orthogonal aaRS and tRNA expression and was absent in isolation  
404 of either component, ruling out misaminoacylation of tRNA<sup>pSer</sup> by seryl-tRNA synthetase (SerRS)  
405 and near cognate suppression. Mapping of SerRS recognition elements onto tRNA<sup>pSer</sup> primary  
406 sequence highlights the low overlap of SerRS recognition elements, providing further evidence  
407 against native SerRS interaction with orthogonal tRNA<sup>pSer</sup> (**Figure 4C**)<sup>64</sup>. Ruling out  
408 misaminoacylation by SerRS as the cause of Ser misincorporation leaves either pSer de-  
409 phosphorylation post-incorporation, or misaminoacylation of tRNA<sup>pSer</sup> with Ser as possible  
410 mechanisms. While de-phosphorylation of pSer may contribute to the Ser levels, the tRNA-  
411 dependent increase in the relative ratio of Ser:pSer points towards a specific interaction between  
412 pSerRS and tRNA<sup>pSer</sup> which results in Ser misaminoacylation (**Figure 4C**). Taken together, these  
413 results illustrate the potential for OTS components to interact with host translational machinery,  
414 resulting in perturbation of substrate pools and relatively high-level mistranslation events.

415 Using the information gained through monitoring host interactions with pSerOTS, we were  
416 able to identify a modification to the OTS which may mitigate a large proportion of pSerOTS-  
417 mediated non-cognate interactions within the cell. The identification of tRNA recognition element  
418 overlap and the seemingly heavy dependence on tRNA interactions for misincorporation events  
419 led to the targeting of tRNA<sup>pSer</sup> for modification. While the G1:C72 pair in the acceptor stem is  
420 essential for pSerRS recognition of tRNA<sup>pSer</sup>, the C2:G71 base pairing on tRNA<sup>pSer</sup> is only

421 recognized by GlyRS and ThrRS, making it an excellent target for modification to reduce off target  
422 interaction. To maintain the GC-content of tRNA<sup>pSer</sup>, we swapped the base pair to create a G2:C71  
423 variant of tRNA<sup>pSer</sup> (tRNA<sub>Opt.</sub><sup>pSer</sup>). Alteration of this specific tRNA base pair has been targeted as a  
424 means to decrease GlyRS recognition previously, but with a different OTS and without thorough  
425 characterization of the interactions between the sequence-modified tRNA and the cell<sup>19</sup>. To  
426 determine whether tRNA<sub>Opt.</sub><sup>pSer</sup> would reduce Gly and Thr misincorporation rates, we created an OTS  
427 variant possessing a single copy of tRNA<sub>Opt.</sub><sup>pSer</sup> and monitored misaminoacylation mediated  
428 misincorporation events using the UAG MS-READ reporter. As we established above, providing  
429 the cell with the sequence-modified tRNA in the absence of the orthogonal aaRS is the most  
430 stringent and challenging test for interaction fidelity between the orthogonal tRNA and host  
431 aaRSs. Under these conditions, we observed a substantial reduction in Gly misincorporation  
432 (~100-fold) when compared to WT tRNA<sup>pSer</sup> under the same experimental conditions. Amazingly,  
433 the interactions between tRNA<sup>pSer</sup> and ThrRS was practically ablated, with any Thr  
434 misincorporation events falling below the limit of detection for this experiment (**Figure 4D**).

435 With these promising results, we constructed a variant of pSerOTSc which included one  
436 copy of the sequence-modified tRNA (pSerOTSc\*). pSerOTSc\* was co-transformed with a UAG  
437 MS-READ reporter for expression in rEcoli<sup>XpS</sup>. In comparison to the OTS with WT tRNA<sup>pSer</sup>, the  
438 relative incorporation rate of Gly:pSer for the OTS with tRNA<sub>Opt.</sub><sup>pSer</sup> was reduced at least 30-fold,  
439 while the relative incorporation rate of Thr:pSer was reduced a remarkable 1000-fold (**Figure 4E**).  
440 At the same time, a large decrease in Ser:pSer relative incorporation rates were also observed,  
441 suggesting that the sequence modification made to the orthogonal tRNA may have reduced Ser  
442 misaminoacylation (**Figure 4E**). A Phos-tag™ assay reflected the increase in recombinant protein  
443 purity quantified in the MS experiment (**Figure 4E**). As a whole, these results illustrate the need  
444 to carefully probe the interactions between OTS components and the host cell. Orthogonal tRNA,  
445 in particular, is centrally positioned as an intermediary of protein synthesis and interacts with a

446 wide range of cellular substrate pools. The substantial improvement in pSerOTS fidelity through  
447 tRNA copy number modulation and sequence modification is a prime example of the power of  
448 data-driven OTS design and its ability to reduce host toxicity.

449

450

451

452

453

454

455

456 Figure 4:

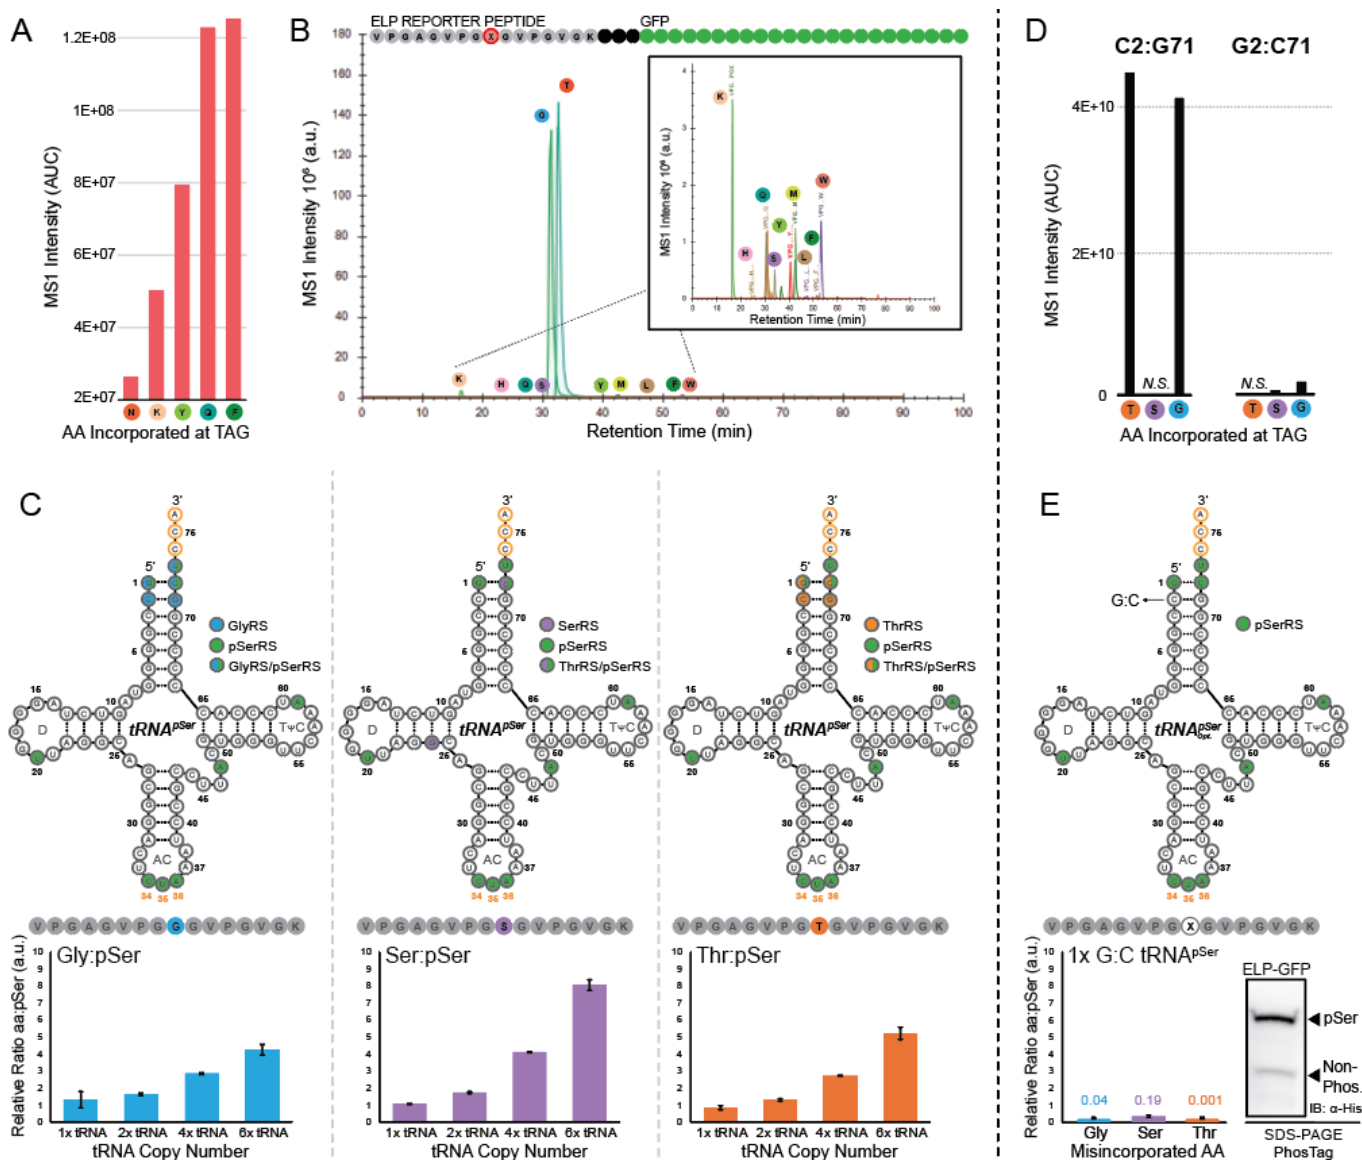

**Figure 4: tRNA identity overlap enables concentration-dependent misaminoacylation.** Amino acid incorporation was monitored at a UAG-containing MS-READ reporter in the absence of an OTS by mass spectrometry. Incorporation was analyzed using Skyline and MS1 precursor ion intensities (area under the curve) was graphed as a function of amino acid identity (**A**). Misaminoacylation by native aaRSs was identified by following incorporation events in a UAG-MS-READ reporter expressed in the presence of orthogonal  $tRNA^{pSer}$ . Incorporation was quantified using Skyline and all incorporation events were displayed by MS1 intensity as a function of retention time (**B**). *E. coli* tRNA identity elements were overlaid onto the primary  $tRNA^{pSer}$  sequence. The effect of tRNA copy number increase on misaminoacylation was followed by mass spectrometry using a UAG-MS-READ reporter in the presence of OTSs with increasing tRNA copy number. Incorporation events from three independent samples were quantified using Skyline and graphed relative to the level of pSer incorporation within the same sample (**C**). The effect of tRNA modification C2:G71 on aminoacylation fidelity was assessed by measuring amino acid incorporation in the at UAG-MS-READ reporter expressed in the presence of modified  $tRNA^{pSer}$  only. Incorporation was analyzed using Skyline and MS1 precursor ion intensities (area under the curve) was graphed as a function of amino acid identity (**D**). The effect of tRNA modification on misaminoacylation was followed by mass spectrometry using a UAG-MS-READ reporter in the presence of modified tRNA. Incorporation events from three independent samples were quantified using Skyline and graphed relative to the level of pSer incorporation within the same sample (**E**).

457 *Tuning of OTS components to enhance orthogonality improves protein yield and purity*

458           Though careful design and systematic testing of components during OTS assembly and  
459 evolution can help to mitigate deleterious outcomes, OTS function should ultimately be judged by  
460 its ability to produce a functional target protein of interest. To test the performance of pSerOTSc  
461 **(Figure 5A)**, we expressed full-length doubly phosphorylated human MEK1. In human cells,  
462 MEK1 is activated by phosphorylation at residues S218 and S222 in the activation loop<sup>65</sup>. We  
463 have previously expressed variants of phosph-MEK1 using pSerOTS $\lambda$  which creates an ideal  
464 frame of reference for OTS performance<sup>18</sup>. The MEK1 (2x UAG) expression vector was co-  
465 transformed with an OTS plasmid (pSerOTS $\lambda$  or pSerOTSc) or a plasmid carrying a suppressor  
466 tRNA<sup>Ser</sup> (supD) as a negative control into rEcoli<sup>XpS</sup> cells or into a serB competent rEcoli<sup>XpS</sup>.  
467 Following expression, crude protein lysate was separated by SDS-PAGE and MEK1  
468 phosphorylation status was assessed using a phospho-specific antibody which recognizes MEK1  
469 pS218/pS222. Lanes 2 and 3 (upper) show phospho-MEK1 expression using pSerOTS $\lambda$  and  
470 pSerOTSc, respectively, in rEcoli cells. The presence of serB in these cells tests the limits of  
471 pSerOTS efficiency and selectivity by decreasing the intracellular pool of pSer relative to near-  
472 cognate amino acids. Under these conditions, pSerOTSc (Lane 3) is able to robustly outperform  
473 pSerOTS $\lambda$  (Lane 2) when compared to total and phospho-MEK1 expression. A similar trend is  
474 observed in rEcoli<sup>XpS</sup> cells where the pool of intracellular pSer has been restored (Lanes 4-5,  
475 **Figure 5B**). To further examine performance in the context of phospho-specificity, we expressed  
476 a split-mCherry fluorescent reporter in the presence of the pSerOTSc tRNA copy number variants.  
477 This reporter reconstitutes fluorescence when one half of mCherry fused to the human phospho-  
478 binding protein 14-3-3 $\beta$  interacts with its phosphorylated peptide substrate fused to the second  
479 half of the mCherry reporter, thereby allowing productive interactions to be observed with single  
480 cell resolution via flow cytometry<sup>66</sup>. Following the trend observed in Figure 1D, increase in tRNA  
481 copy number resulted in a decrease in relative pSer incorporation and, in turn, a decrease in  
482 productive protein-protein interactions. When compared to pSerOTS $\lambda$ , pSerOTSc with 1x tRNA

483 displayed no discernable difference in fluorescence shift compared to the no OTS negative control  
484 sample indicating that pSerOTSc is able to robustly facilitate phospho-dependent protein-protein  
485 interactions *in vivo* (**Figure S8**). Overall, the changes made to the OTS architecture resulted in  
486 an OTS variant which is less toxic to the host and allows for redirection of cellular resources to  
487 facilitate phosphorylation dependent protein-protein interactions and the faithful production of a  
488 doubly phosphorylated recombinant protein.

489 Having established that pSerOTSc works robustly with a ColE1 ORI (~30-40 copies/cell),  
490 we next sought to establish whether decreasing the plasmid copy number by changing the ORI  
491 to p15a (~10-20 copies/cell) had any impact on overall OTS performance. pSerOTSc p15a  
492 variants with increasing tRNA copy number (1x-, 2x-, 4x-, and 6x-tRNA) were co-transformed with  
493 the E(17)TAG-GFP reporter into rEcoli<sup>XpS</sup> cells and analyzed by Phos-tag™ assay. With p15a  
494 ORIs, the OTS variants display the similar trend of increasing misaminoacylation concomitant  
495 with an increase in tRNA abundance observed in the pSerOTSc ColE1 architecture (**Figure 5C**).

496 To more closely examine the impact of copy number decreases on OTS fidelity, the 1x  
497 tRNA pSerOTSc p15a variant was co-transformed with the UAG MS-READ reporter into rEcoli<sup>XpS</sup>  
498 cells. The same three misincorporation events observed in the ColE1-based OTS (Gly, Thr, and  
499 Ser) were also observed in the p15a-based OTS. Misincorporation rates relative to pSer  
500 incorporation, however, were between 3-5 fold lower than those observed in the ColE1 variant  
501 (**Figure 5D**). The additional increase to OTS fidelity when plasmid copy number is decreased is  
502 reflective of the decrease in orthogonal tRNA in the total tRNA pool, lowering the concentration  
503 well below the  $K_m$  for native aaRSs. As a final test of p15a OTS variant performance, we examined  
504 its ability to support expression of a recombinant protein fragment containing human phospho-  
505 mTOR. The pSerOTSc p15a variants, along with supD as a negative control, were separately  
506 transformed into rEcoli<sup>XpS</sup> cells alongside the UAG-containing mTOR expression vector. Cell  
507 lysate was separated by SDS-PAGE and visualized by immunoblot using an antibody specific to  
508 the phosphorylated version of mTOR, and then re-probed using an antibody specific to the 6xHis



509 c-terminal epitope tag to visualize total mTOR-fragment expression<sup>66</sup>. As expected, the negative  
510 control supD expression (Lane 1, upper) failed to illicit a reaction with the phospho-mTOR  
511 antibody, but the presence of bands in Lanes 2-5 (upper) indicates all pSerOTSc p15a variants  
512 facilitate site-specific expression of the phospho-mTOR fragment (**Figure 5E**). Total expression  
513 levels varied across experimental conditions (Lanes 1-5, lower), but the effect of orthogonal tRNA  
514 overexpression on recombinant protein purity follows previously observed trends. The 6x tRNA  
515 OTS, for example, is robustly expressed (Lane 6, lower), but the proportion of phospho-mTOR  
516 production (Lane 6, upper) is significantly lower when compared to the 1x tRNA OTS counterpart  
517 (Lane1) (**Figure 5E**).

518

519

520

521

522

523

524

525

526

527

528

529

530

531

532

533

534

535 Figure 5:

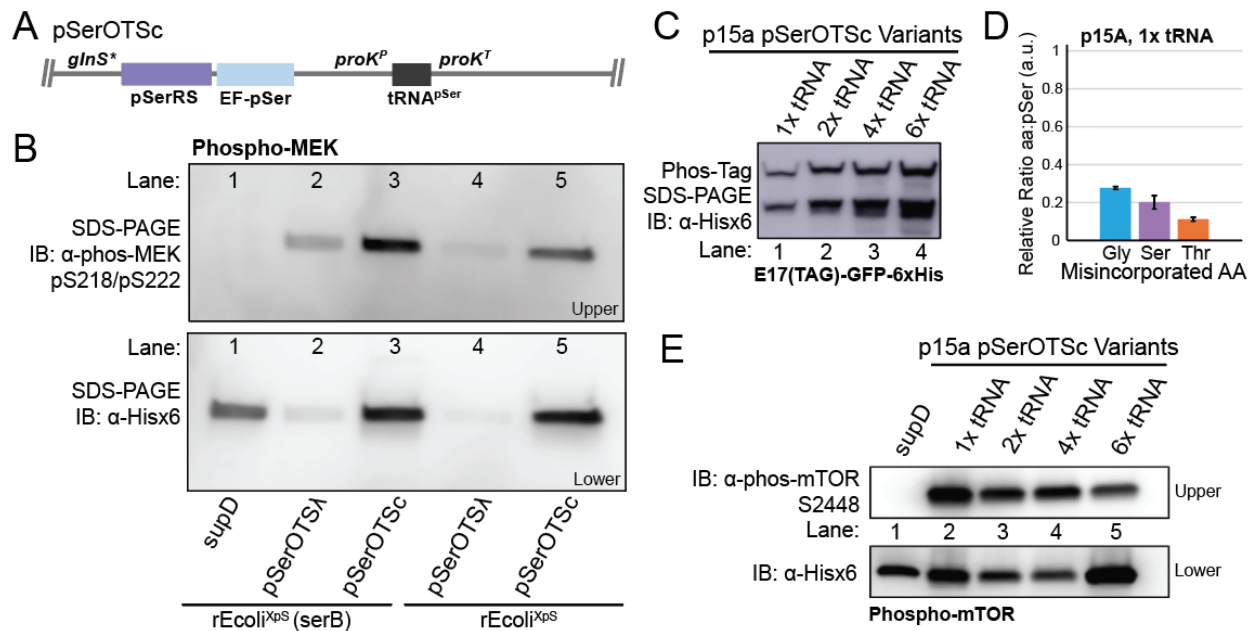

536

**Figure 5: Examination of OTS variant performance.** Architecture of optimized pSerOTSc (A). pSerOTSc performance relative to the progenitor pSerOTSΔ was assessed in both serB competent (Lanes 1-3) and serB deficient (Lanes 4-5) strains by expression of recombinant MEK1 containing two sites for pSer incorporation and visualized by immunoblot using α-phospho-MEK1 S218/S222 (B). The effect of plasmid copy number variation on OTS fidelity was examined by Phos-tag™ gel (C). The effect of p15a OTS variants on misaminoacylation was followed by mass spectrometry using a UAG-MS-READ reporter in the presence of modified tRNA. Incorporation events from three independent samples were quantified using Skyline and graphed relative to the level of pSer incorporation within the same sample (D). The performance of pSerOTSc p15a variants were assessed by expression of a recombinant human mTOR fragment containing a single site for pSer incorporation and visualized by immunoblot using α-phospho-mTOR S2448 (E).

537

538

539

540

541

542

543

## 544 **Discussion**

### 545 *Understanding the role of the host in OTS performance*

546           Hundreds of OTSs have been established to facilitate the incorporation of vast collection  
547 of nsAA. These OTSs are routinely deployed to characterize protein:substrate interactions, further  
548 our understanding of enzyme function, and create synthetically modified proteins with industrial  
549 applications. Though OTSs have been established across all domains of life, most are still  
550 implemented in *E.coli*. Despite this fact, there remains a huge gap in our understanding of the  
551 interactions between OTSs and the host cell and the resulting impact of these interactions on  
552 target protein expression. Using pSerOTS as an example, this study provides the first systematic  
553 characterization of the global effects of OTS introduction to host *E. coli* cells. It should come as  
554 no surprise that, in most cases, *E. coli* acts as more than a vehicle for OTS-mediated protein  
555 expression by exerting influence on transcriptional and translational efficiency through stress  
556 responses and resource allocation.

557           The implementation of OTSs for most recombinant protein expression is performed in  
558 typical protein expression strains (e.g. BL21) modified to reduce proteolytic degradation of  
559 proteins to enhance general recombinant protein yield. While amenable to overall protein  
560 expression, this feature dramatically reduces the mechanisms available to the cell to counteract  
561 the inevitable nonsense suppression events caused by orthogonal suppressor tRNA and  
562 premature translation termination, thus greatly reducing yield in the presence of an OTS. The  
563 development of genetically recoded organisms which reduce or eliminate codons targeted by an  
564 OTS has provided an effective means to bypass the detrimental effects of off target stop codon  
565 suppression. Even in this context, the potential for deleterious interactions with the host cell  
566 remains through a break-down in OTS orthogonality.

567           OTS orthogonality is often regarded as a static condition. However, much like the host cell  
568 itself, this simplification is complicated by the dynamic nature of the cell's response to both  
569 external stimuli and internally by the basal demands of physiological processes. For the first time,

570 our work uniquely demonstrates the highly dynamic nature of OTS performance often overlooked  
571 during OTS development and deployment. The balance of tRNA in the tRNA pool is particularly  
572 integral to maintaining translational fidelity and regulation. Across a wide range of cellular  
573 contexts, alteration of the constituency of tRNA isoacceptors has been reported to increase  
574 misaminoacylation resulting in protein mistranslation and a decrease in the regulatory capacity of  
575 translation<sup>40,67</sup>. Although most tRNA misaminoacylation events are corrected through carefully  
576 evolved post-transfer aa-tRNA proofreading mechanisms, orthogonal tRNAs are rarely developed  
577 in the context of these editing mechanisms and thus may evade them<sup>68-70</sup>.

578 While our understanding of the consequences of natural perturbations to the tRNA pool  
579 has expanded, little has been done outside of the present work to assess the impact of introducing  
580 heavily evolved orthogonal tRNAs specifically on host physiology. We demonstrate here, with  
581 innovative proteomics techniques, that orthogonal tRNA is able to interact with native aaRS *in*  
582 *vivo* to reduce translational fidelity in a concentration dependent manner. Traditional methods of  
583 analyzing tRNA orthogonality fail to address this dynamic property of tRNA recognition and are  
584 therefore more susceptible to reductions in OTS fidelity due to cellular perturbation. Our  
585 comprehensive analysis strategy centers on an unbiased survey of orthogonal tRNA  
586 misaminoacylation via amino acid misincorporation into a mass spectrometry based reporter. The  
587 results of this analysis offer unparalleled insight into authentic and relevant interactions of  
588 orthogonal tRNA with the cell and can be directly applied to expand our knowledge of both tRNA  
589 and OTS biology.

590 These considerations, as a whole, illustrate the vast complexity of potential OTS:host  
591 interactions and highlight the need for detailed analysis of OTS performance and host cell  
592 tolerance. Enriching our understanding of these interactions will ultimately enable more informed  
593 OTS design practices which will limit the impact of OTSs on host cells while simultaneously  
594 improving OTS performance and robustness across a wide range of experimental settings.

595 *Establishing permanent OTS installation through systematic characterization*

596 Expression of OTS components episomally from plasmid vectors presents a number of  
597 challenges to OTS performance and reliability. Plasmid copy number, for example, can vary  
598 substantially according to host strain and growth conditions<sup>71</sup>. This makes even the most carefully  
599 designed plasmid relatively unpredictable outside of the conditions in which the OTS was initially  
600 implemented. To enhance reliability and ease of use, an OTS could theoretically be permanently  
601 installed in the cell. OTSs have been genomically integrated previously, but with few  
602 considerations for host environment and interactions with host translational machinery<sup>72</sup>. Here we  
603 show how variations in OTS component expression can be benchmarked against native host  
604 cellular processes while simultaneously monitoring OTS efficiency. Information on how the  
605 orthogonal aaRS and tRNA are positioned in the proteome and cellular substrate pool relative to  
606 host counterparts will be critical to install an OTS in the genome with the stability of native  
607 translational machinery. Any stress created by overexpression of an OTS component may cause  
608 a negative selection pressure resulting in the extrication, or inactivation, of the OTS from the  
609 genome. Indeed, we and others have observed transposon inactivation of pSerOTS $\lambda$   
610 (*unpublished observation*). Data-driven design and integration of OTS components to produce  
611 levels of expression comparable to those in native substrate pools paired with improvements to  
612 component orthogonality should circumvent extraneous stress resulting from OTS installation.  
613 Overall, the ability to successfully install OTSs into the translational complement of host cells will  
614 greatly enhance access to these important technologies by improving ease of use and overall  
615 reliability, making stable genomic integration an attractive target for the future of OTSs.

616

617

618 **Methods**

619 Cell growth and general techniques

620 All DNA oligonucleotides with standard purification and desalting and Sanger DNA

621 sequencing services were obtained through the Keck DNA Sequencing facility and  
622 Oligonucleotide Resource, Yale University. Unless otherwise stated, all cultures were grown  
623 at 37 °C in LB-Lennox medium (LB, 10 g/L bacto tryptone, 5 g/L sodium chloride, 5 g/L  
624 yeast extract). LB agar plates were LB plus 16 g/L bacto agar. Antibiotics were supplemented for  
625 selection, where appropriate (Kanamycin, 50 µg/mL and Ampicillin, 100 µg/mL). *E. coli* Top10  
626 cells (Invitrogen, Carlsbad, CA) were used for cloning and plasmid propagation. NEBuilder HiFi  
627 Assembly Mix and restriction enzymes were obtained from New England BioLabs. Plasmid DNA  
628 preparation was carried out with the QIAprep Spin Miniprep Kit (Qiagen). Pre-cast 4–12% (wt/vol)  
629 Bis-Tris gels for SDS-PAGE were purchased from Bio-Rad. Phos-Tag™ reagent for hand-cast  
630 protein gels was purchased from Wako.

631 A complete list of strains and plasmids may be found in Supplemental Table 1. All plasmids  
632 were transformed into recipient strains by electroporation. Electrocompetent cells were prepared  
633 by inoculating 20 mL of LB with 200 µL of saturated culture and growing at 37 °C until reaching  
634 an OD<sub>600</sub> of 0.4. Cells were harvested by centrifugation at 8,000 RPM for 2 min. at 4 °C. Cells  
635 pellets were washed twice with 20 mL ice cold 10% glycerol in deionized water (dH<sub>2</sub>O).  
636 Electrocompetent pellets were re-suspended in 100 µL of 10% glycerol in dH<sub>2</sub>O. 50 ng of plasmid  
637 was mixed with 50 µL of re-suspended electrocompetent cells and transferred to 0.1 cm cuvettes,  
638 electroporated (BioRad GenePulser™, 1.78 kV, 200 Ω, 25 µF), and then immediately  
639 resuspended in 600 µL of LB. Transformed cells were recovered at 37 °C for one hour and 100  
640 µL was subsequently plated on appropriate selective medium.

641  
642 Construction of OTS vectors

643 Detailed construction of OTS plasmids may be found in Supplemental Data Attachment 1.  
644 Generally, OTS components were amplified from the progenitor OTS, pSerOTSλ (SepOTSλ,  
645 Addgene # 68292). The pSerRS (SepRS9) and EF-pSer (EF-Sep21) were amplified from  
646 pSerOTSλ and placed under the control of the glnS\* promoter and assembled with the kanamycin

647 selection marker and origin of replication from pSerOTS $\lambda$  by gibbon assembly using NEBuilder  
648 HiFi DNA Assembly master mix (NEB). tRNA expression cassettes (1x-, 2x-, 4x-, and 6x-tRNA)  
649 were constructed from a 2x-tRNA construct under the control of a proK tRNA promoter and  
650 terminator and separated by a valU tRNA linker that was ordered as a DNA fragment from  
651 Genewiz. tRNA cassettes were assembled into the previously assembled pSerRS-EF-pSer  
652 backbone by gibbon assembly creating ColE1-based pSerOTSc OTSs. OTS variants with  
653 different origins of replication were created by assembly of Rop amplified from pSerOTS $\lambda$  into the  
654 ColE1-based OTSs and p15a variants were created by replacement of ColE1 with p15a origins  
655 by gibbon assembly.

656

#### 657 Construction of rEcoli<sup>XpS</sup>

658 Strain modification using a lambda red based strategy was performed as previously  
659 described<sup>73</sup>. Briefly, transformants carrying a lambda red plasmid (pKD46) were grown in 20 mL  
660 LB cultures with ampicillin and l-arabinose at 30°C to an OD<sub>600</sub> of  $\approx$ 0.6 and then made  
661 electrocompetent. 10–100 ng of PCR product targeting serB was transformed into the prepared  
662 cells and recovered in 1 mL of LB for 1 h at 37°C. Following recovery, one-half was spread onto  
663 LB-agar plates with Kanamycin for selection. serB gene deletion was verified by PCR and  
664 selected colonies were purified non-selectively at 37°C remove pKD46. The KAN deletion  
665 cassette was excised from the serB locus using FLP recombinase (pCP20).

666

#### 667 Growth characterization

668 Stationary phase pre-cultures were obtained by overnight growth with shaking at  
669 37°C in 5 mL of LB supplemented with antibiotic for plasmid maintenance, where appropriate.  
670 Stationary phase cultures were diluted to an OD<sub>600</sub> of 0.01 in 250  $\mu$ L of LB supplemented with  
671 appropriate antibiotic. Growth was monitored on a Biotek Synergy H1 plate reader. OD<sub>600</sub> was  
672 recorded at 10-minute intervals for 16 hours at 37 °C with continuous shaking. All data were

673 measured in triplicate. Growth rate was determined for each replicate and replicates were  
674 averaged. Since some strains achieved lower maximum cell densities, slope was calculated  
675 based on the linear regression of  $\ln(\text{OD}_{600})$  through 4-6 contiguous time points (40-60  
676 minutes) rather than between two pre-determined  $\text{OD}_{600}$  values.

677

678 Analytical gel and immunoblotting

679 100  $\mu\text{M}$  Phos-tag™ acrylamide (Wako) within hand-cast 12% acrylamide gels were used  
680 for separation of phosphorylated reporter proteins. SDS-PAGE gels (4–15% acrylamide, Bio-Rad)  
681 and Phos-tag™ gels were transferred onto PVDF membranes. All gels were visualized by  
682 immunoblot. Anti-His immunoblots were performed using 1:2,500 diluted rabbit Anti-6xHis  
683 antibody (PA1-983B, Thermo Fisher Scientific) in 5% w/v milk in TBST for 1 h. Phospho-mTOR  
684 (Ser2448) (Cell Signaling, D9C2) Rabbit mAb was used at 1:1,000 dilutions in 5% w/v milk in  
685 TBST for 1 h. Phospho-MEK1 production was confirmed with a commercially available phospho-  
686 specific antibody for positions 218 and 222 (Phospho-MEK1/2 (Ser217/221), 9154, Cell Signaling  
687 Technology) at 1:1,000 dilution in 5% w/v milk in TBST for 1 h. Secondary antibody incubations  
688 used 1:10,000 diluted donkey anti-rabbit HRP (711-035-152, Jackson ImmunoResearch) in 5%  
689 w/v milk in TBST for 1 h. Protein bands were then visualized using Clarity ECL substrate (Bio-  
690 Rad) and an Amersham Imager 600 (GE Healthcare Life Sciences).

691

692 MS-READ reporter purification

693 Frozen *E. coli* cell pellets were thawed on ice and pellets were lysed by sonication with  
694 lysis buffer consisting of 50 mM Tris-HCl (pH 7.4, 23°C), 500 mM NaCl, 0.5 mM EGTA, 1mM DTT,  
695 10 % glycerol, 50 mM NaF, and 1 mM  $\text{Na}_3\text{O}_4\text{V}$ . The extract was clarified with two rounds of  
696 centrifugation performed for 20 minutes at 4 °C and 14,000 x g. Cell free extracts were applied to  
697 Ni-NTA metal affinity resin and purified according to the manufacturer's instructions. Wash buffers



698 contained 50 mM Tris pH 7.5, 500 mM NaCl, 0.5 mM EGTA, 1mM DTT, 50 mM NaF, 1 mM  
699 Na<sub>3</sub>VO<sub>4</sub> and increasing concentrations of imidazole 20 mM, 40mM, and 60mM, sequentially.  
700 Proteins were eluted with wash buffer containing 250 mM imidazole. Eluted protein was subjected  
701 to 4 rounds of buffer exchange (20mM Tris pH 8.0 and 100mM NaCl) and concentrated using a  
702 30 kDa molecular weight cutoff spin filter (Amicon).

703

704 Protein digestion and mass spectrometry

705 *MS-READ analysis:* Affinity purified, buffer exchanged protein was digested and analyzed  
706 by mass spectrometry as described previously with some modifications . Briefly, the concentration  
707 of protein was determined by UV280 spectroscopy and 5 µg ELP-GFP (MS-READ) reporter from  
708 *E. coli* was and dissolved in 12.5 µl solubilization buffer consisting of 10 mM Tris-HCl pH=8.5  
709 (23°C), 10 mM DTT, 1 mM EDTA and 0.5 % acid labile surfactant (ALS-101, Protea). Samples  
710 were heat denatured for 20 min at 55 °C in a heat block. Alkylation of cysteines was performed  
711 with iodoacetamide (IAM) using a final IAM concentration of 24 mM. The alkylation reaction  
712 proceeded for 30 min at room temperature in the dark. Excess IAM was quenched with DTT and  
713 the buffer concentration was adjusted using a 1 M Tris-HCl pH 8.5 resulting in a final Tris-HCl  
714 concentration of 150 mM. The reaction was then diluted with water and 1 M CaCl<sub>2</sub> solution to  
715 obtain a ALS-101 concentration of 0.045 % and 2 mM CaCl<sub>2</sub> respectively. Finally, sequencing  
716 grade porcine trypsin (Promega) was added to obtain an enzyme/protein ratio of 1/5.3 and the  
717 digest was incubated for 15 h at 37 °C without shaking. The digest was quenched with 20% TFA  
718 solution resulting in a sample pH of 2. Cleavage of the acid cleavable detergent proceeded for 15  
719 min at room temperature. Digests were frozen at -80 °C until further processing. Peptides were  
720 desalted on C<sub>18</sub> UltraMicroSpin columns (The Nest Group Inc.) essentially following the  
721 instructions provided by the manufacturer but using 300 µl elution solvent consisting of 80% ACN,  
722 0.1% TFA for peptide elution. Peptides were dried in a vacuum centrifuge at room temperature.

723 Dried peptides were reconstituted and analyzed by LC-MS/MS.

724 *Digestion of intact E. coli for shotgun proteomics:* 20 mL cultures were inoculated to a  
725 starting OD 600nm of 0.01 in LB media using an overnight culture to stationary phase. After  
726 reaching mid-log, cells chilled on ice and pelleted by centrifugation for 2 min at 8000 rpm. The  
727 resulting pellet was frozen at -80 °C for downstream processing. For cell lysis and protein digest,  
728 cell pellets were thawed on ice and 2 ul of cell pellet was transferred to a microcentrifuge tube  
729 containing 40 µl of lysis buffer (10 mM Tris-HCl pH 8.6, 10 mM DTT, 1 mM EDTA, and 0.5 %  
730 ALS). Cells were lysed by vortex for 30 s and disulfide bonds were reduced by incubating the  
731 reaction for 30 min. at 55 °C . The reaction was briefly quenched on ice and 16 µl of a 60 mM IAM  
732 solution was added. Alkylation of cysteines proceeded for 30 min in the dark. Excess IAM was  
733 quenched with 14 µl of a 25 mM DTT solution and the sample was then diluted with 330 µl of 183  
734 mM Tris-HCl buffer pH 8.0 supplemented with 2 mM CaCl<sub>2</sub>. Proteins were digested overnight  
735 using 12 µg sequencing grade trypsin. Following digestion, the reaction was then quenched with  
736 12.5 µl of a 20 % TFA solution, resulting in a sample pH<3. Remaining ALS reagent was cleaved  
737 for 15 min at room temperature. The sample ( ~30 µg protein) was desalted by reverse phase  
738 clean-up using C<sub>18</sub> UltraMicroSpin columns. The desalted peptides were dried at room  
739 temperature in a rotary vacuum centrifuge and reconstituted in 30 µl 70 % formic acid 0.1 % TFA  
740 (3:8 v/v) for peptide quantitation by UV<sub>280</sub>. The sample was diluted to a final concentration of 0.2  
741 µg/µl and 5 µl (1 µg) was injected for LC-MS/MS analysis.

742 *Data acquisition and analysis:* LC-MS/MS was performed using an ACQUITY UPLC M-  
743 Class (Waters) and Q Exactive Plus mass spectrometer. The analytical column employed was a  
744 65-cm-long, 75-µm-internal-diameter PicoFrit column (New Objective) packed in-house to a  
745 length of 50 cm with 1.9 µm ReproSil-Pur 120 Å C18-AQ (Dr. Maisch) using methanol as the  
746 packing solvent. Peptide separation was achieved using mixtures of 0.1% formic acid in water  
747 (solvent A) and 0.1% formic acid in acetonitrile (solvent B) with either a 90-min gradient 0/1, 2/7,

748 60/24, 65/48, 70/80, 75/80, 80/1, 90/1; (min/%B, linear ramping between steps). Gradient was  
749 performed with a flowrate of 250 nl/min. At least one blank injection (5  $\mu$ l 2% B) was performed  
750 between samples to eliminate peptide carryover on the analytical column. 100 fmol of trypsin-  
751 digested BSA or 100 ng trypsin-digested wildtype K-12 MG1655 *E. coli* proteins were run  
752 periodically between samples as quality control standards. The mass spectrometer was  
753 operated with the following parameters: (MS1) 70,000 resolution, 3e6 AGC target, 300–1,700 m/z  
754 scan range; (data dependent-MS2) 17,500 resolution, 1e<sup>6</sup> AGC target, top 10 mode, 1.6 m/z  
755 isolation window, 27 normalized collision energy, 90 s dynamic exclusion, unassigned and +1  
756 charge exclusion. Data was searched using Maxquant version 1.6.10.43 with Deamidation (NQ),  
757 Oxidation (M), and Phospho(STY) as variable modifications and Carbamidomethyl (C) as a fixed  
758 modification with up to 3 missed cleavages, 5 AA minimum length, and 1% FDR against a  
759 modified Uniprot *E. coli* database containing custom MS-READ reporter proteins. MS-READ  
760 search results were analyzed using Skyline version 20.1.0.31 and proteome search results were  
761 analyzed with Perseus version 1.6.2.2.

762

763

764

765

766

767

768

769

770

771 **References**

- 772 1 Sander, T. *et al.* Allosteric Feedback Inhibition Enables Robust Amino Acid Biosynthesis  
773 in *E. coli* by Enforcing Enzyme Overabundance. *Cell systems* **8**, 66-75 e68,  
774 doi:10.1016/j.cels.2018.12.005 (2019).
- 775 2 Starosta, A. L., Lassak, J., Jung, K. & Wilson, D. N. The bacterial translation stress  
776 response. *FEMS microbiology reviews* **38**, 1172-1201, doi:10.1111/1574-6976.12083  
777 (2014).
- 778 3 Zampieri, M., Horl, M., Hotz, F., Muller, N. F. & Sauer, U. Regulatory mechanisms  
779 underlying coordination of amino acid and glucose catabolism in *Escherichia coli*. *Nature*  
780 *communications* **10**, 3354, doi:10.1038/s41467-019-11331-5 (2019).
- 781 4 Brown, A., Fernandez, I. S., Gordiyenko, Y. & Ramakrishnan, V. Ribosome-dependent  
782 activation of stringent control. *Nature* **534**, 277-280, doi:10.1038/nature17675 (2016).
- 783 5 Pang, Y. L., Poruri, K. & Martinis, S. A. tRNA synthetase: tRNA aminoacylation and  
784 beyond. *Wiley interdisciplinary reviews. RNA* **5**, 461-480, doi:10.1002/wrna.1224 (2014).
- 785 6 Ibba, M. & Soll, D. Aminoacyl-tRNA synthesis. *Annu Rev Biochem* **69**, 617-650,  
786 doi:10.1146/annurev.biochem.69.1.617 (2000).
- 787 7 Jakubowski, H. & Goldman, E. Editing of errors in selection of amino acids for protein  
788 synthesis. *Microbiological reviews* **56**, 412-429 (1992).
- 789 8 Mohler, K. *et al.* Editing of misaminoacylated tRNA controls the sensitivity of amino acid  
790 stress responses in *Saccharomyces cerevisiae*. *Nucleic acids research* **45**, 3985-3996,  
791 doi:10.1093/nar/gkx077 (2017).
- 792 9 Bullwinkle, T. J. & Ibba, M. Translation quality control is critical for bacterial responses to  
793 amino acid stress. *Proceedings of the National Academy of Sciences of the United States*  
794 *of America* **113**, 2252-2257, doi:10.1073/pnas.1525206113 (2016).

- 795 10 Mohler, K., Mann, R. & Ibba, M. Isoacceptor specific characterization of tRNA  
796 aminoacylation and misacylation in vivo. *Methods* **113**, 127-131,  
797 doi:10.1016/j.ymeth.2016.09.003 (2017).
- 798 11 Wang, K., Neumann, H., Peak-Chew, S. Y. & Chin, J. W. Evolved orthogonal ribosomes  
799 enhance the efficiency of synthetic genetic code expansion. *Nature biotechnology* **25**, 770-  
800 777, doi:10.1038/nbt1314 (2007).
- 801 12 Liu, C. C. & Schultz, P. G. Adding new chemistries to the genetic code. *Annu Rev Biochem*  
802 **79**, 413-444, doi:10.1146/annurev.biochem.052308.105824 (2010).
- 803 13 Jin, X., Park, O. J. & Hong, S. H. Incorporation of non-standard amino acids into proteins:  
804 challenges, recent achievements, and emerging applications. *Applied microbiology and*  
805 *biotechnology*, doi:10.1007/s00253-019-09690-6 (2019).
- 806 14 Kim, C. H., Axup, J. Y. & Schultz, P. G. Protein conjugation with genetically encoded  
807 unnatural amino acids. *Current opinion in chemical biology* **17**, 412-419,  
808 doi:10.1016/j.cbpa.2013.04.017 (2013).
- 809 15 Davis, L. & Chin, J. W. Designer proteins: applications of genetic code expansion in cell  
810 biology. *Nature reviews. Molecular cell biology* **13**, 168-182, doi:10.1038/nrm3286 (2012).
- 811 16 Olsen, J. V. *et al.* Global, in vivo, and site-specific phosphorylation dynamics in signaling  
812 networks. *Cell* **127**, 635-648, doi:10.1016/j.cell.2006.09.026 (2006).
- 813 17 Humphrey, S. J., James, D. E. & Mann, M. Protein Phosphorylation: A Major Switch  
814 Mechanism for Metabolic Regulation. *Trends in endocrinology and metabolism: TEM* **26**,  
815 676-687, doi:10.1016/j.tem.2015.09.013 (2015).
- 816 18 Park, H. S. *et al.* Expanding the genetic code of Escherichia coli with phosphoserine.  
817 *Science* **333**, 1151-1154, doi:10.1126/science.1207203 [pii] 10.1126/science.1207203 (2011).

- 818 19 Zhang, M. S. *et al.* Biosynthesis and genetic encoding of phosphothreonine through  
819 parallel selection and deep sequencing. *Nat Methods* **14**, 729-736,  
820 doi:10.1038/nmeth.4302 (2017).
- 821 20 Xie, J., Supekova, L. & Schultz, P. G. A genetically encoded metabolically stable analogue  
822 of phosphotyrosine in *Escherichia coli*. *ACS chemical biology* **2**, 474-478 (2007).
- 823 21 Luo, X. *et al.* Genetically encoding phosphotyrosine and its nonhydrolyzable analog in  
824 bacteria. *Nature chemical biology* **13**, 845-849, doi:10.1038/nchembio.2405 (2017).
- 825 22 Hoppmann, C. *et al.* Site-specific incorporation of phosphotyrosine using an expanded  
826 genetic code. *Nature chemical biology* **13**, 842-844, doi:10.1038/nchembio.2406 (2017).
- 827 23 Lee, S. *et al.* A facile strategy for selective incorporation of phosphoserine into histones.  
828 *Angew Chem Int Ed Engl* **52**, 5771-5775, doi:10.1002/anie.201300531 (2013).
- 829 24 Pirman, N. L. *et al.* A flexible codon in genomically recoded *Escherichia coli* permits  
830 programmable protein phosphorylation. *Nature communications* **6**, 8130,  
831 doi:10.1038/ncomms9130 (2015).
- 832 25 Zhu, P., Gafken, P. R., Mehl, R. A. & Cooley, R. B. A Highly Versatile Expression System  
833 for the Production of Multiply Phosphorylated Proteins. *ACS chemical biology* **14**, 1564-  
834 1572, doi:10.1021/acscchembio.9b00307 (2019).
- 835 26 Rogerson, D. T. *et al.* Efficient genetic encoding of phosphoserine and its nonhydrolyzable  
836 analog. *Nature chemical biology* **11**, 496-503, doi:10.1038/nchembio.1823 (2015).
- 837 27 Lajoie, M. J. *et al.* Genomically recoded organisms expand biological functions. *Science*  
838 **342**, 357-360, doi:10.1126/science.1241459 (2013).
- 839 28 Isaacs, F. J. *et al.* Precise manipulation of chromosomes in vivo enables genome-wide  
840 codon replacement. *Science* **333**, 348-353, doi:10.1126/science.1205822 (2011).
- 841 29 Heinemann, I. U. *et al.* Enhanced phosphoserine insertion during *Escherichia coli* protein  
842 synthesis via partial UAG codon reassignment and release factor 1 deletion. *FEBS letters*  
843 **586**, 3716-3722, doi:10.1016/j.febslet.2012.08.031 (2012).

- 844 30 Johnson, D. B. *et al.* Release factor one is nonessential in Escherichia coli. *ACS Chem*  
845 *Biol* **7**, 1337-1344, doi:10.1021/cb300229q (2012).
- 846 31 Johnson, D. B. *et al.* RF1 knockout allows ribosomal incorporation of unnatural amino  
847 acids at multiple sites. *Nature chemical biology* **7**, 779-786, doi:10.1038/nchembio.657  
848 (2011).
- 849 32 Ling, J., Reynolds, N. & Ibba, M. Aminoacyl-tRNA synthesis and translational quality  
850 control. *Annual review of microbiology* **63**, 61-78,  
851 doi:10.1146/annurev.micro.091208.073210 (2009).
- 852 33 Gruic-Sovulj, I., Uter, N., Bullock, T. & Perona, J. J. tRNA-dependent aminoacyl-adenylate  
853 hydrolysis by a nonediting class I aminoacyl-tRNA synthetase. *The Journal of biological*  
854 *chemistry* **280**, 23978-23986, doi:10.1074/jbc.M414260200 (2005).
- 855 34 Ahel, I., Korencic, D., Ibba, M. & Söll, D. Trans-editing of mischarged tRNAs. *Proc. Natl.*  
856 *Acad. Sci. U.S.A.* **100**, 15422-15427 (2003).
- 857 35 Jakubowski, H. Quality control in tRNA charging. *Wiley interdisciplinary reviews. RNA* **3**,  
858 295-310, doi:10.1002/wrna.122 (2012).
- 859 36 Steinfeld, J. B., Aerni, H. R., Rogulina, S., Liu, Y. & Rinehart, J. Expanded cellular amino  
860 acid pools containing phosphoserine, phosphothreonine, and phosphotyrosine. *ACS*  
861 *Chem Biol* **9**, 1104-1112, doi:10.1021/cb5000532 (2014).
- 862 37 Chatterjee, A., Sun, S. B., Furman, J. L., Xiao, H. & Schultz, P. G. A versatile platform for  
863 single- and multiple-unnatural amino acid mutagenesis in Escherichia coli. *Biochemistry*  
864 **52**, 1828-1837, doi:10.1021/bi4000244 (2013).
- 865 38 Mukai, T. *et al.* Highly reproductive Escherichia coli cells with no specific assignment to  
866 the UAG codon. *Scientific reports* **5**, 9699, doi:10.1038/srep09699 (2015).
- 867 39 Sherman, J. M., Rogers, M. J. & Soll, D. Competition of aminoacyl-tRNA synthetases for  
868 tRNA ensures the accuracy of aminoacylation. *Nucleic acids research* **20**, 2847-2852  
869 (1992).

- 870 40 Swanson, R. *et al.* Accuracy of in vivo aminoacylation requires proper balance of tRNA  
871 and aminoacyl-tRNA synthetase. *Science* **242**, 1548-1551 (1988).
- 872 41 Battesti, A. & Bouveret, E. Acyl carrier protein/SpoT interaction, the switch linking SpoT-  
873 dependent stress response to fatty acid metabolism. *Molecular microbiology* **62**, 1048-  
874 1063, doi:10.1111/j.1365-2958.2006.05442.x (2006).
- 875 42 Xiao, H. *et al.* Residual guanosine 3',5'-bispyrophosphate synthetic activity of relA null  
876 mutants can be eliminated by spoT null mutations. *The Journal of biological chemistry*  
877 **266**, 5980-5990 (1991).
- 878 43 Loveland, A. B. *et al.* Ribosome\*RelA structures reveal the mechanism of stringent  
879 response activation. *eLife* **5**, doi:10.7554/eLife.17029 (2016).
- 880 44 Hohn, M. J., Park, H. S., O'Donoghue, P., Schnitzbauer, M. & Söll, D. Emergence of the  
881 universal genetic code imprinted in an RNA record. *Proc. Natl. Acad. Sci. U.S.A.* **103**,  
882 18095-18100, doi:0608762103 [pii] 10.1073/pnas.0608762103 (2006).
- 883 45 Ruusala, T., Ehrenberg, M. & Kurland, C. G. Is there proofreading during polypeptide  
884 synthesis? *The EMBO journal* **1**, 741-745 (1982).
- 885 46 Gromadski, K. B. & Rodnina, M. V. Kinetic determinants of high-fidelity tRNA  
886 discrimination on the ribosome. *Molecular cell* **13**, 191-200 (2004).
- 887 47 LaRiviere, F. J., Wolfson, A. D. & Uhlenbeck, O. C. Uniform binding of aminoacyl-tRNAs  
888 to elongation factor Tu by thermodynamic compensation. *Science* **294**, 165-168,  
889 doi:10.1126/science.1064242 (2001).
- 890 48 Mohler, K. *et al.* MS-READ: Quantitative measurement of amino acid incorporation.  
891 *Biochimica et biophysica acta*, doi:10.1016/j.bbagen.2017.01.025 (2017).
- 892 49 Nameki, N., Tamura, K., Asahara, H. & Hasegawa, T. Recognition of tRNA(Gly) by three  
893 widely diverged glycyl-tRNA synthetases. *Journal of molecular biology* **268**, 640-647,  
894 doi:10.1006/jmbi.1997.0993 (1997).



- 895 50 Biswas, D. K. & Gorini, L. Restriction, de-restriction and mistranslation in missense  
896 suppression. Ribosomal discrimination of transfer RNA's. *Journal of molecular biology* **64**,  
897 119-134 (1972).
- 898 51 Manickam, N., Nag, N., Abbasi, A., Patel, K. & Farabaugh, P. J. Studies of translational  
899 misreading in vivo show that the ribosome very efficiently discriminates against most  
900 potential errors. *Rna* **20**, 9-15, doi:10.1261/rna.039792.113 (2014).
- 901 52 Lu, K. V., Rohde, M. F., Thomason, A. R., Kenney, W. C. & Lu, H. S. Mistranslation of a  
902 TGA termination codon as tryptophan in recombinant platelet-derived growth factor  
903 expressed in Escherichia coli. *The Biochemical journal* **309 ( Pt 2)**, 411-417 (1995).
- 904 53 Roy, B., Leszyk, J. D., Mangus, D. A. & Jacobson, A. Nonsense suppression by near-  
905 cognate tRNAs employs alternative base pairing at codon positions 1 and 3. *Proceedings*  
906 *of the National Academy of Sciences of the United States of America* **112**, 3038-3043,  
907 doi:10.1073/pnas.1424127112 (2015).
- 908 54 Singaravelan, B., Roshini, B. R. & Munavar, M. H. Evidence that the supE44 mutation of  
909 Escherichia coli is an amber suppressor allele of glnX and that it also suppresses ochre  
910 and opal nonsense mutations. *Journal of bacteriology* **192**, 6039-6044,  
911 doi:10.1128/JB.00474-10 (2010).
- 912 55 Fan, Y. *et al.* Protein mistranslation protects bacteria against oxidative stress. *Nucleic*  
913 *acids research* **43**, 1740-1748, doi:10.1093/nar/gku1404 (2015).
- 914 56 Fan, Y. *et al.* Heterogeneity of Stop Codon Readthrough in Single Bacterial Cells and  
915 Implications for Population Fitness. *Molecular cell* **67**, 826-836 e825,  
916 doi:10.1016/j.molcel.2017.07.010 (2017).
- 917 57 Baggett, N. E., Zhang, Y. & Gross, C. A. Global analysis of translation termination in E.  
918 coli. *PLoS genetics* **13**, e1006676, doi:10.1371/journal.pgen.1006676 (2017).

- 919 58 Beznoskova, P., Wagner, S., Jansen, M. E., von der Haar, T. & Valasek, L. S. Translation  
920 initiation factor eIF3 promotes programmed stop codon readthrough. *Nucleic acids*  
921 *research* **43**, 5099-5111, doi:10.1093/nar/gkv421 (2015).
- 922 59 Gan, Q. & Fan, C. Increasing the fidelity of noncanonical amino acid incorporation in cell-  
923 free protein synthesis. *Biochimica et biophysica acta. General subjects* **1861**, 3047-3052,  
924 doi:10.1016/j.bbagen.2016.12.002 (2017).
- 925 60 Giege, R., Sissler, M. & Florentz, C. Universal rules and idiosyncratic features in tRNA  
926 identity. *Nucleic acids research* **26**, 5017-5035 (1998).
- 927 61 Giege, R. *et al.* Structure of transfer RNAs: similarity and variability. *Wiley interdisciplinary*  
928 *reviews. RNA* **3**, 37-61, doi:10.1002/wrna.103 (2012).
- 929 62 Hasegawa, T. *et al.* Identity determinants of E. coli threonine tRNA. *Biochemical and*  
930 *biophysical research communications* **184**, 478-484, doi:10.1016/0006-291x(92)91219-g  
931 (1992).
- 932 63 Nameki, N., Asahara, H. & Hasegawa, T. Identity elements of *Thermus thermophilus*  
933 tRNA(Thr). *FEBS letters* **396**, 201-207, doi:10.1016/0014-5793(96)01094-0 (1996).
- 934 64 Lenhard, B., Orellana, O., Ibba, M. & Weygand-Durasevic, I. tRNA recognition and  
935 evolution of determinants in seryl-tRNA synthesis. *Nucleic acids research* **27**, 721-729,  
936 doi:10.1093/nar/27.3.721 (1999).
- 937 65 Ordan, M. *et al.* Intrinsically active MEK variants are differentially regulated by proteinases  
938 and phosphatases. *Scientific reports* **8**, 11830, doi:10.1038/s41598-018-30202-5 (2018).
- 939 66 Barber, K. W. *et al.* Encoding human serine phosphopeptides in bacteria for proteome-  
940 wide identification of phosphorylation-dependent interactions. *Nature biotechnology*,  
941 doi:10.1038/nbt.4150 (2018).
- 942 67 O'Connor, M. tRNA imbalance promotes -1 frameshifting via near-cognate decoding.  
943 *Journal of molecular biology* **279**, 727-736, doi:10.1006/jmbi.1998.1832 (1998).

- 944 68 Jakubowski, H. & Fersht, A. R. Alternative pathways for editing non-cognate amino acids  
945 by aminoacyl-tRNA synthetases. *Nucleic acids research* **9**, 3105-3117 (1981).
- 946 69 Martinis, S. A. & Boniecki, M. T. The balance between pre- and post-transfer editing in  
947 tRNA synthetases. *FEBS letters*. **48**, 455 (2010).
- 948 70 Roy, H., Ling, J., Irnov, M. & Ibba, M. Post-transfer editing in vitro and in vivo by the beta  
949 subunit of phenylalanyl-tRNA synthetase. *The EMBO journal* **23**, 4639-4648 (2004).
- 950 71 Wegrzyn, G. Replication of plasmids during bacterial response to amino acid starvation.  
951 *Plasmid* **41**, 1-16, doi:10.1006/plas.1998.1377 (1999).
- 952 72 Amiram, M. *et al.* Evolution of translation machinery in recoded bacteria enables multi-site  
953 incorporation of nonstandard amino acids. *Nature biotechnology* **33**, 1272-1279,  
954 doi:10.1038/nbt.3372 (2015).
- 955 73 Datsenko, K. A. & Wanner, B. L. One-step inactivation of chromosomal genes in  
956 *Escherichia coli* K-12 using PCR products. *Proceedings of the National Academy of*  
957 *Sciences of the United States of America* **97**, 6640-6645, doi:10.1073/pnas.120163297  
958 (2000).
- 959
